# Supplementary material for: Identification of structure–biodegradability relationships for ionic liquids – clustering of a dataset based on structural similarity
Source: Royal Society of Chemistry journal article supplement (doi:10.1039/d3gc02392c), 2023-01-01
Supplement: d3gc02392c1.pdf [file d3gc02392c1.pdf]

## Supplementary Information

### Identification of structure-biodegradability relationships for ionic liquids - clustering of a dataset based on structural similarity

Ann-Kathrin Amsel,<sup>a,b</sup> Oliver Olsson<sup>a</sup> and Klaus Kümmerer<sup>\*a,b</sup>

---

<sup>a</sup>Institute of Sustainable Chemistry, Leuphana University of Lüneburg Universitätsallee 1, D-21335 Lüneburg, Germany.

E-Mail: klaus.kuemmerer@leuphana.de

<sup>b</sup>Research and Education Hub, International Sustainable Chemistry Collaborative Centre (ISC3), Leuphana University of Lüneburg, Universitätsallee 1, D-21335 Lüneburg, Germany.

#### List of Tables

|                                                                                              |    |
|----------------------------------------------------------------------------------------------|----|
| Table S1: Biodegradability data for imidazolium ILs.....                                     | 2  |
| Table S2: Biodegradability data for pyridinium ILs.....                                      | 8  |
| Table S3: Biodegradability data for QACs.....                                                | 12 |
| Table S4: Biodegradability data for cholinium ILs. ....                                      | 14 |
| Table S5: Biodegradability data for phosphonium ILs.....                                     | 17 |
| Table S6: Biodegradability data for pyrrolidinium ILs. ....                                  | 18 |
| Table S7: Biodegradability data for morpholinium ILs. ....                                   | 19 |
| Table S8: Biodegradability data for DABCO ILs.....                                           | 20 |
| Table S9: Biodegradability data for piperidinium ILs.....                                    | 20 |
| Table S10: Biodegradability data for piperazinium ILs. ....                                  | 21 |
| Table S11: Biodegradability data for prolinium ILs.....                                      | 21 |
| Table S12: Biodegradability data for thiazolium ILs. ....                                    | 21 |
| Table S13: Cluster centroids for imidazolium ILs and structural features per cluster. ....   | 23 |
| Table S14: Cluster centroids for pyridinium ILs and structural features per cluster.....     | 27 |
| Table S15: Cluster centroids for QACs and structural features per cluster.....               | 29 |
| Table S16: Cluster centroids for cholinium ILs and structural features per cluster. ....     | 30 |
| Table S17: Cluster centroids for phosphonium ILs and structural features per cluster.....    | 32 |
| Table S18: Cluster centroids for pyrrolidinium ILs and structural features per cluster. .... | 35 |

## Biodegradability data

### Data for imidazolium ILS

Table S1: Biodegradability data for imidazolium ILS.

| IL<br>(cation_number_<br>biodegradation<br>rate) | SMILES                                                                       | biodegradation rate in<br>% |
|--------------------------------------------------|------------------------------------------------------------------------------|-----------------------------|
| Imid_115_0                                       | <chem>[Br-].C=1C=CC(C=C=1)n1cc[n+](c1)c1cccc1</chem>                         | 0 <sup>1</sup>              |
| Imid_116_0                                       | <chem>[Br-].Fc1c(c(F)c(F)c(F)c1F)n1cc[n+](C)c1</chem>                        | 0 <sup>1</sup>              |
| Imid_36_0                                        | <chem>C[N+]1=CN(C=C1)CC#N.[Cl-]</chem>                                       | 0 <sup>2</sup>              |
| Imid_43_0                                        | <chem>[Br-].Cn1cc[n+](Cc2ccccc2)c1</chem>                                    | 0 <sup>3</sup>              |
| Imid_45_0                                        | <chem>[Br-].C=CC[n+]1ccn(C)c1</chem>                                         | 0 <sup>3</sup>              |
| Imid_74_8                                        | <chem>CCN1C=C[N+](=C1)C.[Br-]</chem>                                         | 8 <sup>4</sup>              |
| Imid_76_7                                        | <chem>CCN1C(=C([N+](=C1C(C)C)C)C)C.[I-]</chem>                               | 7 <sup>5</sup>              |
| Imid_77_2                                        | <chem>[I-].C[n+]1c(C)c(C)n(CC)c1C</chem>                                     | 2 <sup>5</sup>              |
| Imid_78_6                                        | <chem>[I-].Cc1c(C)n(CC)c[n+]1C</chem>                                        | 6 <sup>5</sup>              |
| Imid_1_0                                         | <chem>C[N+]1=CN(CCCC)C=C1.[Br-]</chem>                                       | 0 <sup>6-11</sup>           |
| Imid_5_5                                         | <chem>C[N+]1=CN(CCCC)C=C1.N#C[N-]C#N</chem>                                  | 5 <sup>6</sup>              |
| Imid_29_1                                        | <chem>[N+]1(C)=CN(C=C1)CCCC.[Cl-]</chem>                                     | 1 <sup>12,13</sup>          |
| Imid_31_39                                       | <chem>[N+]1(C)=CN(C=C1)CCCCCCCC.[Cl-]</chem>                                 | 39 <sup>12,14,15</sup>      |
| Imid_46_0                                        | <chem>CCCC[n+]1ccn(c1)C=C.[I-]</chem>                                        | 0 <sup>3</sup>              |
| Imid_72_31                                       | <chem>[N+]1(C)=CN(C=C1)CCCCCC.[Br-]</chem>                                   | 31 <sup>4,9</sup>           |
| Imid_73_41                                       | <chem>[N+]1(C)=CN(C=C1)CCCCCCCC.[Br-]</chem>                                 | 41 <sup>9</sup>             |
| Imid_75_26                                       | <chem>CCCCCCCCCN1C=C[N+](=C1)C.[Br-]</chem>                                  | 26 <sup>4</sup>             |
| Imid_79_9                                        | <chem>[I-].Cc1c(C)n(CC)c[n+]1C</chem>                                        | 6 <sup>5</sup>              |
| Imid_98_0                                        | <chem>[Br-].[Br-].C[n+]1ccn(c1)CCCCCn1cc[n+](C)c1</chem>                     | 0 <sup>16</sup>             |
| Imid_100_0                                       | <chem>[Br-].[Br-].CCCCC[n+]1cn(Cc2cc[n+](c2)CCCC)cc1</chem>                  | 0 <sup>16</sup>             |
| Imid_104_0                                       | <chem>[Br-].Cc1ccc(cc1)n1cc[n+](c1)CCCC</chem>                               | 0 <sup>17</sup>             |
| Imid_117_0                                       | <chem>[Cl-].C[n+]1ccn(CCCCCCCCCCCCCC)c1</chem>                               | 0 <sup>1,18</sup>           |
| Imid_146_10                                      | <chem>CCCCCCCCCCCN1C=C[N+](=C1)C.[Br-]</chem>                                | 10 <sup>19</sup>            |
| Imid_185_9                                       | <chem>[Br-].[Br-].CCCCCCCCCn1cc[n+](c1)CCCC[n+]1ccn(CCCCCCCCCC)c1</chem>     | 9 <sup>19</sup>             |
| Imid_186_13                                      | <chem>[Br-].[Br-].CCCCCCCCCCCCCn1cc[n+](c1)CCCC[n+]1ccn(CCCCCCCCCC)c1</chem> | 13 <sup>19</sup>            |

|             |                                                                                           |                     |
|-------------|-------------------------------------------------------------------------------------------|---------------------|
| Imid_187_18 | [Br-].[Br-].CCCCCCCCCCCCCCCCn1cc[n+](c1)CCCC[n+]1ccn(CCCCCCCCCCCCCCCC)c1                  | 18 <sup>19</sup>    |
| Imid_188_18 | CCCCCCCCCCCCCN1C=C[N+](=C1)C.[Br-]                                                        | 18 <sup>19</sup>    |
| Imid_189_20 | CCCCCCCCCCCCCCCCN1C=C[N+](=C1)C.[Br-]                                                     | 20 <sup>19</sup>    |
| Imid_13_0   | [Br-].C[n+]1ccn(CC(=O)NCCCC)c1                                                            | 0 <sup>7</sup>      |
| Imid_246_0  | CN1C=C[N+](C(C(NCCCC)=O)C2=CC=CC=C2)=C1.[Br-]                                             | 0 <sup>20</sup>     |
| Imid_190_32 | CCCCn1cc[n+](C)c1.[O-]C(=O)C1CCCN1                                                        | 32 <sup>21</sup>    |
| Imid_191_47 | CCCCn1cc[n+](C)c1.CC(C)C(N)C([O-])=O                                                      | 47 <sup>21</sup>    |
| Imid_192_33 | CCCCn1cc[n+](C)c1.[O-]C(=O)CN                                                             | 33 <sup>21</sup>    |
| Imid_193_19 | CCCCn1cc[n+](C)c1.[O-]C(=O)C(N)CS                                                         | 19 <sup>21</sup>    |
| Imid_194_25 | CCCCn1cc[n+](C)c1.[O-]C(=O)C(N)Cc1c[NH]cn1                                                | 25 <sup>21</sup>    |
| Imid_195_30 | CCCCn1cc[n+](C)c1.[O-]C(=O)C(N)Cc1cccc1                                                   | 30 <sup>21</sup>    |
| Imid_196_46 | CCCCn1cc[n+](C)c1.[O-]C(=O)C(N)CC(=O)O                                                    | 46 <sup>21</sup>    |
| Imid_197_16 | SCC(N)C([O-])=O.C[n+]1ccn(CC)c1                                                           | 16 <sup>21</sup>    |
| Imid_198_17 | [O-]C(=O)C(N)CS.C[n+]1ccn(CCCCC)c1                                                        | 17 <sup>21</sup>    |
| Imid_234_47 | [Br-].O=C(C[n+]1ccn(C)c1)N[C@@H](Cc1cccc1)C(=O)OCC                                        | 47 <sup>22,23</sup> |
| Imid_235_56 | O=C([C@H](CC1=CC=CC=C1)NC(C[N+]=CN(C=C2)C)=O)OCCCC.[Br-]                                  | 56 <sup>23,24</sup> |
| Imid_236_51 | O=C([C@H](CC1=CC=CC=C1)NC(C[N+]=CN(C=C2)C)=O)OCCCCC.[Br-]                                 | 51 <sup>23</sup>    |
| Imid_237_48 | CN1C=C[N+](CC(N[C@@H](CC2=CC=CC=C2)C(OCCCCCCC)=O)=O)=C1.[Br-]                             | 48 <sup>23</sup>    |
| Imid_238_44 | CN1C=C[N+](CC(N[C@@H](CC2=CC=CC=C2)C(OCCCCCCC)=O)=O)=C1.[Br-]                             | 44 <sup>23,25</sup> |
| Imid_239_15 | CN1C=C[N+](CC(N[C@@H](CC2=CC=CC=C2)C(OCCCCCCC)=O)=O)=C1.[Br-]                             | 15 <sup>23</sup>    |
| Imid_240_40 | CCOC([C@H](CC1=CC=CC=C1)NC(CN2C=C[N+](CC(N[C@@H](CC3=CC=CC=C3)C(OCC)=O)=O)=C2)=O)=O.[Br-] | 40 <sup>22,26</sup> |
| Imid_241_64 | [Br-].C[n+]1ccn(CC(=O)NC(Cc2cccc2)C(=O)NC(CC(C)C)C(=O)OC)c1                               | 64 <sup>24</sup>    |
| Imid_242_40 | CCOC([C@H](CC1=CC=C(O)C=C1)NC(C[N+]=CN(C)C=C2)=O)=O.[Br-]                                 | 40 <sup>22</sup>    |
| Imid_168_2  | [Br-].O=C(c1cn(CC(=O)OCC)c[n+]1Cc1cccc1)N1CCCC1                                           | 2 <sup>27</sup>     |
| Imid_169_2  | [Br-].O=C(c1n(CC(=O)OCC)c[n+](Cc2cccc2)c1C(=O)N1CCCC1)N1CCCC1                             | 2 <sup>27</sup>     |
| Imid_14_0   | [Br-].C[n+]1ccn(CC(=O)N(C)CCCC)c1                                                         | 0 <sup>7</sup>      |
| Imid_15_0   | [Br-].C[n+]1ccn(CC(=O)N(CC)CC)c1                                                          | 0 <sup>7</sup>      |
| Imid_158_3  | [Br-].O=C(Cn1cc[n+](C)c1)N1CCCC1                                                          | 3 <sup>27</sup>     |
| Imid_159_0  | [Br-].O=C(Cn1cc[n+](Cc2cccc2)c1)N1CCCC1                                                   | 0 <sup>27</sup>     |
| Imid_160_3  | [Br-].O=C(Cn1cc[n+](C)c1)N1CCCC1                                                          | 3 <sup>27</sup>     |

|              |                                                                                                              |                        |
|--------------|--------------------------------------------------------------------------------------------------------------|------------------------|
| Imid_161_12  | [Br-].O=C(Cn1cc[n+](C)c1C(N)=O)N1CCCC1                                                                       | 12 <sup>27</sup>       |
| Imid_162_14  | O=C(Cn1cc[n+](C)c1C(N)=O)N1CCCC1.F[B-](F)(F)F                                                                | 14 <sup>27</sup>       |
| Imid_3_4     | C[N+]=CN(CCCC)C=C1.F[B-](F)(F)F                                                                              | 4 <sup>6-8,28,29</sup> |
| Imid_4_3     | C[N+]=CN(CCCC)C=C1.F[P-](F)(F)(F)F                                                                           | 3 <sup>6,7,13,28</sup> |
| Imid_70_0    | C[n+]=ccn(CCC)c1.F[P-](F)(F)(F)F                                                                             | 0 <sup>2</sup>         |
| Imid_249_21  | [B-](F)(F)(F).CCCCCCCCCN1C=C[N+](=C1)C                                                                       | 21 <sup>11</sup>       |
| Imid_18_16   | F[B-](F)(F)F.O=C(OCCC)Cn1cc[n+](C)c1                                                                         | 16 <sup>6</sup>        |
| Imid_19_16   | F[P-](F)(F)(F)F.O=C(OCCC)Cn1cc[n+](C)c1                                                                      | 16 <sup>6</sup>        |
| Imid_54_4    | Cn1cc[n+](CCCC)c1.[O-]P(=O)(OCCCC)OCCCC                                                                      | 4 <sup>3</sup>         |
| Imid_153_3   | CN1C=CN(CC=C)[CH+].FC(F)(F)C(C(F)(F)F)O[Al-]<br>](OC(C(F)(F)F)C(F)(F)OC(C(F)(F)F)C(F)(F)OC(C(F)(F)F)C(F)(F)  | 3 <sup>30</sup>        |
| Imid_154_0   | CN1C=CN(CCCC)[C+].FC(F)(F)C(C(F)(F)F)O[Al-]<br>](OC(C(F)(F)F)C(F)(F)OC(C(F)(F)F)C(F)(F)OC(C(F)(F)F)C(F)(F)   | 0 <sup>30</sup>        |
| Imid_155_2   | CN1C=CN(CCCCC)[CH+].FC(F)(F)C(C(F)(F)F)O[Al-]<br>](OC(C(F)(F)F)C(F)(F)OC(C(F)(F)F)C(F)(F)OC(C(F)(F)F)C(F)(F) | 2 <sup>30</sup>        |
| Imid_157_14  | COC(=O)Cn1cc[n+](C)c1.F[B-](F)(F)F                                                                           | 14 <sup>27</sup>       |
| Imid_165_35  | Cn1cc[n+](C)c1C(=O)OCC(C)C.F[B-](F)(F)F                                                                      | 35 <sup>27</sup>       |
| Imid_167_5   | F[B-](F)(F)F.O=C(OCC)c1cn(CC(=O)OCC)c[n+]=1C                                                                 | 5 <sup>27</sup>        |
| Imid_171_6   | F[B-](F)(F)F.O=C(OC)c1c([n+](cn1CC(=O)OCC)Cc1cccc1)C(=O)OC                                                   | 6 <sup>27</sup>        |
| Imid_172_31  | F[B-](F)(F)F.O=C(OC)c1c([n+](C)cn1CC(=O)OCC)C(=O)OC                                                          | 31 <sup>27</sup>       |
| Imid_173_3   | C[n+]=1cn(C)c1C(=O)OC.C(=O)OC.F[B-](F)(F)F                                                                   | 3 <sup>27</sup>        |
| Imid_179_100 | [Cl-].[Cl-].CCCCCCCCCCCC(=O)OCCC[n+]=1ccn(CCCCn2cc[n+](c2)CCCOC(=O)CCCCCCCCCCCC)c1                           | 100 <sup>19</sup>      |
| Imid_180_100 | [Cl-].[Cl-].CCCCCCCCCCCCCCCC(=O)OCCC[n+]=1ccn(CCCCn2cc[n+](c2)CCCOC(=O)CCCCCCCCCCCCCCCC)c1                   | 100 <sup>19</sup>      |
| Imid_181_100 | [Cl-].[Cl-].CCCCCCCCCCCCCCCCCCCC(=O)OCCC[n+]=1ccn(CCCCn2cc[n+](c2)CCCOC(=O)CCCCCCCCCCCCCCCCCCCC)c1           | 100 <sup>19</sup>      |
| Imid_182_50  | [Br-].[Br-].Cn1cc[n+](CC(COC(=O)CCCCCCCCCCCC)(C[n+]=2ccn(C)c2)COC(=O)CCCCCCCCCCCC)c1                         | 50 <sup>19</sup>       |
| Imid_183_53  | [Br-].[Br-].Cn1cc[n+](CC(COC(=O)CCCCCCCCCCCCCCCC)(C[n+]=2ccn(C)c2)COC(=O)CCCCCCCCCCCCCCCC)c1                 | 53 <sup>19</sup>       |
| Imid_184_65  | [Br-].[Br-].Cn1cc[n+](CC(COC(=O)CCCCCCCCCCCCCCCCCCCC)(C[n+]=2ccn(C)c2)COC(=O)CCCCCCCCCCCCCCCCCCCC)c1         | 65 <sup>19</sup>       |
| Imid_10_26   | [Br-].O=C(OCCCC)Cn1cc[n+](C)c1                                                                               | 26 <sup>7</sup>        |
| Imid_11_24   | [Br-].O=C(OCCCCC)Cn1cc[n+](C)c1                                                                              | 24 <sup>7</sup>        |
| Imid_12_27   | [Br-].O=C(OCCCCCCC)Cn1cc[n+](C)c1                                                                            | 27 <sup>7</sup>        |
| Imid_16_21   | [Br-].O=C(OCCC)Cn1cc[n+](C)c1                                                                                | 21 <sup>6-8</sup>      |
| Imid_22_23   | [Br-].O=C(OCCC)Cn1cc[n+](C)c1C                                                                               | 23 <sup>8</sup>        |

|             |                                                                                                                                |                     |
|-------------|--------------------------------------------------------------------------------------------------------------------------------|---------------------|
| Imid_23_32  | [Br-].O=C(OCCCCC)Cn1cc[n+](C)c1                                                                                                | 32 <sup>3,7,8</sup> |
| Imid_24_33  | [Br-].O=C(OCCCCC)Cn1cc[n+](C)c1C                                                                                               | 33 <sup>8</sup>     |
| Imid_44_23  | [I-].Cn1cc[n+](CCCCOC(C)=O)c1                                                                                                  | 23 <sup>3</sup>     |
| Imid_109_7  | [Br-].O=C(OCC)c1ccc(cc1)n1cc[n+](c1)CCCC                                                                                       | 7 <sup>17</sup>     |
| Imid_110_8  | [Br-].O=C(OCC)c1ccc(cc1)n1cc[n+](c1)CCCCC                                                                                      | 8 <sup>17</sup>     |
| Imid_245_27 | CN1C=C[N+](C(C(OCCCC)=O)C2=CC=CC=C2)=C1.[Br-]                                                                                  | 27 <sup>20</sup>    |
| Imid_20_34  | N#C\N=C=[N-].O=C(OCCC)Cn1cc[n+](C)c1                                                                                           | 34 <sup>6</sup>     |
| Imid_229_29 | N#CCn1cc[n+](CCOCC)c1.N#C[N-]C#N                                                                                               | 29 <sup>31</sup>    |
| Imid_230_23 | N#CCn1cc[n+](CCOCC)c1.FC(F)(F)C([O-])=O                                                                                        | 23 <sup>31</sup>    |
| Imid_247_62 | CCCCn1cc[n+](C)c1.CCCCCCCCCC(=O)N(C)CC([O-])=O                                                                                 | 62 <sup>32</sup>    |
| Imid_248_57 | O=C([O-])CN(C)C(=O)CCCCCCCCC.C[n+]1ccn(CC)c1                                                                                   | 57 <sup>32</sup>    |
| Imid_53_17  | Cn1cc[n+](CCCC)c1.[O-]C(=O)C(C)O                                                                                               | 17 <sup>3</sup>     |
| Imid_80_25  | CCCCn1cc[n+](C)c1.CC(=O)CCC([O-])=O                                                                                            | 25 <sup>33</sup>    |
| Imid_112_0  | O=C([O-])C(F)(F)C(F)(F)C(F)(F)C(F)(F)C(F)(F)F.C[n+]1ccn(CC)c1                                                                  | 0 <sup>34</sup>     |
| Imid_120_9  | O=C([O-])C.C[n+]1ccn(CC)c1                                                                                                     | 9 <sup>35</sup>     |
| Imid_42_0   | [Br-].OCC[n+]1ccn(C)c1                                                                                                         | 0 <sup>3</sup>      |
| Imid_114_0  | C[n+]1ccn(CCO)c1.FC(F)(F)C(F)(F)C(F)(F)C(F)(F)C(F)(F)C([O-])=O                                                                 | 0 <sup>34</sup>     |
| Imid_8_21   | [Br-].O=C(OCC)Cn1cc[n+](C)c1                                                                                                   | 21 <sup>7</sup>     |
| Imid_156_14 | [Br-].COC(=O)Cn1cc[n+](C)c1                                                                                                    | 14 <sup>7,27</sup>  |
| Imid_163_17 | [Br-].COC(=O)Cn1cc[n+](C)c1C(N)=O                                                                                              | 17 <sup>27</sup>    |
| Imid_164_30 | [I-].Cn1cc[n+](C)c1C(=O)OCC(C)C                                                                                                | 30 <sup>27</sup>    |
| Imid_166_10 | [Br-].O=C(OCC)c1cn(CC(=O)OCC)c[n+]1C                                                                                           | 10 <sup>27</sup>    |
| Imid_170_24 | [Br-].O=C(OC)c1c([n+](cn1CC(=O)OCC)Cc1ccccc1)C(=O)OC                                                                           | 24 <sup>27</sup>    |
| Imid_174_12 | [I-].C[n+]1cn(C)c(c1C(=O)OC)C(=O)OC                                                                                            | 12 <sup>27</sup>    |
| Imid_243_5  | CN1C=C[N+](C(C(OC)=O)C2=CC=CC=C2)=C1.[Br-]                                                                                     | 5 <sup>20</sup>     |
| Imid_244_20 | CN1C=C[N+](C(C2=CC=CC=C2)C(OCC)=O)=C1.[Br-]                                                                                    | 20 <sup>20</sup>    |
| Imid_250_0  | [Br-].OC(=O)C[n+]1ccn(C)c1                                                                                                     | 0 <sup>23</sup>     |
| Imid_122_35 | [Cl-].[Cl-].[Cl-].[Cl-].CCCC[n+]1ccn(c1)CC(=O)OCC(COC(=O)Cn1cc[n+](c1)CCCC)(COC(=O)Cn1cc[n+](CCCC)c1)COC(=O)Cn1cc[n+](CCCC)c1  | 35 <sup>36</sup>    |
| Imid_123_39 | [Cl-].[Cl-].[Cl-].[Cl-].CCCCC[n+]1ccn(c1)CC(=O)OCC(COC(=O)Cn1cc[n+](c1)CCCC)(COC(=O)Cn1cc[n+](CCCC)c1)COC(=O)Cn1cc[n+](CCCC)c1 | 39 <sup>36</sup>    |

|             |                                                                                                                                                                   |                  |
|-------------|-------------------------------------------------------------------------------------------------------------------------------------------------------------------|------------------|
| Imid_124_49 | [Cl-].[Cl-].[Cl-].[Cl-].CCCCCCCC[n+]1ccn(c1)CC(=O)OCC(COC(=O)Cn1cc[n+](c1)CCCCCCCC)(COC(=O)Cn1cc[n+](CCCCCCCC)c1)COC(=O)Cn1cc[n+](CCCCCCCC)c1                     | 49 <sup>36</sup> |
| Imid_125_52 | [Cl-].[Cl-].[Cl-].[Cl-].CCCCCCCC[n+]1ccn(c1)CC(=O)OCC(COC(=O)Cn1cc[n+](c1)CCCCCCCC)(COC(=O)Cn1cc[n+](CCCCCCCC)c1)COC(=O)Cn1cc[n+](CCCCCCCC)c1                     | 52 <sup>36</sup> |
| Imid_126_53 | [Cl-].[Cl-].[Cl-].[Cl-].CCCCCCCC[n+]1ccn(c1)CC(=O)OCC(COC(=O)Cn1cc[n+](c1)CCCCCCCC)(COC(=O)Cn1cc[n+](CCCCCCCC)c1)COC(=O)Cn1cc[n+](CCCCCCCC)c1                     | 53 <sup>36</sup> |
| Imid_134_27 | [Cl-].[Cl-].[Cl-].CCCC[n+]1ccn(c1)CC(=O)OCC(C)(COC(=O)Cn1cc[n+](c1)CCCC)COC(=O)Cn1cc[n+](CCCC)c1                                                                  | 27 <sup>37</sup> |
| Imid_135_36 | [Cl-].[Cl-].[Cl-].CCCC[n+]1ccn(c1)CC(=O)OCC(C)(COC(=O)Cn1cc[n+](c1)CCCC)COC(=O)Cn1cc[n+](CCCC)c1                                                                  | 36 <sup>37</sup> |
| Imid_136_47 | [Cl-].[Cl-].[Cl-].CCCC[n+]1ccn(c1)CC(=O)OCC(C)(COC(=O)Cn1cc[n+](c1)CCCC)COC(=O)Cn1cc[n+](CCCC)c1                                                                  | 47 <sup>37</sup> |
| Imid_137_45 | [Cl-].[Cl-].[Cl-].CCCC[n+]1ccn(c1)CC(=O)OCC(C)(COC(=O)Cn1cc[n+](c1)CCCC)COC(=O)Cn1cc[n+](CCCC)c1                                                                  | 45 <sup>37</sup> |
| Imid_138_51 | [Cl-].[Cl-].[Cl-].CCCC[n+]1ccn(c1)CC(=O)OCC(C)(COC(=O)Cn1cc[n+](c1)CCCC)COC(=O)Cn1cc[n+](CCCC)c1                                                                  | 51 <sup>37</sup> |
| Imid_128_28 | [Cl-].[Cl-].[Cl-].[Cl-].CCC[n+]1cn(CC(=O)OCC(COC(=O)Cn2c[n+](CCCC)c3cccc32)(COC(=O)Cn2c[n+](CCCC)c3cccc32)COC(=O)Cn2c[n+](CCCC)c3cccc32)c2cccc21                  | 28 <sup>36</sup> |
| Imid_129_34 | [Cl-].[Cl-].[Cl-].[Cl-].CCCC[n+]1cn(CC(=O)OCC(COC(=O)Cn2c[n+](CCCC)c3cccc32)(COC(=O)Cn2c[n+](CCCC)c3cccc32)COC(=O)Cn2c[n+](CCCC)c3cccc32)c2cccc21                 | 34 <sup>36</sup> |
| Imid_130_42 | [Cl-].[Cl-].[Cl-].[Cl-].CCCC[n+]1cn(CC(=O)OCC(COC(=O)Cn2c[n+](CCCC)c3cccc32)(COC(=O)Cn2c[n+](CCCC)c3cccc32)COC(=O)Cn2c[n+](CCCC)c3cccc32)c2cccc21                 | 42 <sup>36</sup> |
| Imid_140_22 | [Cl-].[Cl-].[Cl-].CCC[n+]1cn(CC(=O)OCC(C)(COC(=O)Cn2c[n+](CCCC)c3cccc32)COC(=O)Cn2c[n+](CCCC)c3cccc32)c2cccc21                                                    | 22 <sup>37</sup> |
| Imid_141_27 | [Cl-].[Cl-].[Cl-].CCCC[n+]1cn(CC(=O)OCC(C)(COC(=O)Cn2c[n+](CCCC)c3cccc32)COC(=O)Cn2c[n+](CCCC)c3cccc32)c2cccc21                                                   | 27 <sup>37</sup> |
| Imid_142_36 | [Cl-].[Cl-].[Cl-].CCCC[n+]1cn(CC(=O)OCC(C)(COC(=O)Cn2c[n+](CCCC)c3cccc32)COC(=O)Cn2c[n+](CCCC)c3cccc32)c2cccc21                                                   | 36 <sup>37</sup> |
| Imid_143_40 | [Cl-].[Cl-].[Cl-].CCCC[n+]1cn(CC(=O)OCC(C)(COC(=O)Cn2c[n+](CCCC)c3cccc32)COC(=O)Cn2c[n+](CCCC)c3cccc32)c2cccc21                                                   | 40 <sup>37</sup> |
| Imid_144_45 | [Cl-].[Cl-].[Cl-].CCCC[n+]1cn(CC(=O)OCC(C)(COC(=O)Cn2c[n+](CCCC)c3cccc32)COC(=O)Cn2c[n+](CCCC)c3cccc32)c2cccc21                                                   | 45 <sup>37</sup> |
| Imid_127_22 | [Cl-].[Cl-].[Cl-].[Cl-].O=C(Cn1cc[n+](Cc2cccc2)c1)OCC(COC(=O)Cn1cc[n+](c1)Cc1cccc1)(COC(=O)Cn1cc[n+](Cc2cccc2)c1)COC(=O)Cn1cc[n+](Cc2cccc2)c1                     | 22 <sup>36</sup> |
| Imid_133_22 | [Cl-].[Cl-].[Cl-].[Cl-].O=C(Cn1c[n+](Cc2cccc2)c2cccc21)OCC(COC(=O)Cn1c[n+](Cc2cccc2)c2cccc21)(COC(=O)Cn1c[n+](Cc2cccc2)c2cccc21)COC(=O)Cn1c[n+](Cc2cccc2)c2cccc21 | 22 <sup>36</sup> |
| Imid_139_20 | [Cl-].[Cl-].[Cl-].CC(COC(=O)Cn1cc[n+](c1)Cc1cccc1)(COC(=O)Cn1cc[n+](Cc2cccc2)c1)COC(=O)Cn1cc[n+](Cc2cccc2)c1                                                      | 20 <sup>37</sup> |
| Imid_145_16 | [Cl-].[Cl-].[Cl-].CC(COC(=O)Cn1c[n+](Cc2cccc2)c2cccc21)(COC(=O)Cn1c[n+](Cc2cccc2)c2cccc21)COC(=O)Cn1c[n+](Cc2cccc2)c2cccc21                                       | 16 <sup>37</sup> |
| Imid_55_42  | CCCC[n+]1ccn(C)c1.O=C1[N-]S(=O)(=O)c2cccc12                                                                                                                       | 42 <sup>3</sup>  |
| Imid_56_61  | O=C(OCCCC)C[n+]1ccn(C)c1.O=C1[N-]S(=O)(=O)c2cccc12                                                                                                                | 61 <sup>3</sup>  |
| Imid_6_5    | CCCN1C=C[N+](=C1)C.C(F)(F)(F)S(=O)(=O)[N-]S(=O)(=O)C(F)(F)F                                                                                                       | 5 <sup>6</sup>   |
| Imid_21_25  | FC(F)(F)S(=O)(=O)[N-]S(=O)(=O)C(F)(F)F.O=C(OCCC)Cn1cc[n+](C)c1                                                                                                    | 25 <sup>6</sup>  |
| Imid_231_65 | N#CCn1cc[n+](CCOCC)c1.FC(F)(F)S(=O)(=O)[N-]S(=O)(=O)C(F)(F)F                                                                                                      | 65 <sup>31</sup> |

|             |                                                                                |                      |
|-------------|--------------------------------------------------------------------------------|----------------------|
| Imid_232_62 | <chem>N#CCn1cc[n+](CCOCCOC)c1.FC(F)(F)S(=O)(=O)[N-]S(=O)(=O)C(F)(F)F</chem>    | 62 <sup>31</sup>     |
| Imid_233_62 | <chem>N#CCn1cc[n+](CCOCCOCCOC)c1.FC(F)(F)S(=O)(=O)[N-]S(=O)(=O)C(F)(F)F</chem> | 62 <sup>31</sup>     |
| Imid_51_8   | <chem>Cn1cc[n+](CCCC)c1.[O-]S(C)(=O)=O</chem>                                  | 8 <sup>3</sup>       |
| Imid_111_0  | <chem>C[n+]1ccn(CC)c1.FC(F)(F)C(F)(F)C(F)(F)C(F)(F)S([O-])(=O)=O</chem>        | 0 <sup>34</sup>      |
| Imid_113_0  | <chem>C[n+]1ccn(CCO)c1.FC(F)(F)C(F)(F)C(F)(F)C(F)(F)S([O-])(=O)=O</chem>       | 0 <sup>34</sup>      |
| Imid_2_33   | <chem>CCCCCCCCOS(=O)(=O)[O-].CCCCN1C=C[N+](=C1)C</chem>                        | 33 <sup>3,6</sup>    |
| Imid_47_38  | <chem>Cn1cc[n+](Cc2ccccc2)c1.[O-]S(=O)(=O)OCCCCCCCC</chem>                     | 38 <sup>3</sup>      |
| Imid_48_44  | <chem>C=CC[n+]1ccn(C)c1.[O-]S(=O)(=O)OCCCCCCCC</chem>                          | 44 <sup>3</sup>      |
| Imid_49_43  | <chem>C=Cn1cc[n+](CCCC)c1.[O-]S(=O)(=O)OCCCCCCCC</chem>                        | 43 <sup>3</sup>      |
| Imid_57_34  | <chem>Cn1cc[n+](CCCC)c1.[O-]S(=O)(=O)OCCCCCCCC</chem>                          | 34 <sup>3</sup>      |
| Imid_58_36  | <chem>Cn1cc[n+](CCCC)c1.[O-]S(=O)(=O)OCCCCCCCC</chem>                          | 36 <sup>3</sup>      |
| Imid_60_47  | <chem>Cn1cc[n+](CCCC)c1.[O-]S(=O)(=O)OCCCCCCCC</chem>                          | 47 <sup>3</sup>      |
| Imid_61_54  | <chem>Cn1cc[n+](CCCC)c1.[O-]S(=O)(=O)OCCCCCCCC</chem>                          | 54 <sup>3</sup>      |
| Imid_62_58  | <chem>Cn1cc[n+](CCCC)c1.[O-]S(=O)(=O)OCCCCCCCC</chem>                          | 58 <sup>3</sup>      |
| Imid_63_30  | <chem>Cn1cc[n+](CCCCC)c1.[O-]S(=O)(=O)OCCCCCCCC</chem>                         | 30 <sup>3</sup>      |
| Imid_64_33  | <chem>Cn1cc[n+](CCCCC)c1.[O-]S(=O)(=O)OCCCCCCCC</chem>                         | 33 <sup>3</sup>      |
| Imid_65_38  | <chem>Cn1cc[n+](CCCCC)c1.[O-]S(=O)(=O)OCCCCCCCC</chem>                         | 38 <sup>3</sup>      |
| Imid_66_36  | <chem>Cn1cc[n+](CCCCC)c1.[O-]S(=O)(=O)OCCCCCCCC</chem>                         | 36 <sup>3</sup>      |
| Imid_67_44  | <chem>Cn1cc[n+](CCCCC)c1.[O-]S(=O)(=O)OCCCCCCCC</chem>                         | 44 <sup>3</sup>      |
| Imid_68_49  | <chem>Cn1cc[n+](CCCCC)c1.[O-]S(=O)(=O)OCCCCCCCC</chem>                         | 49 <sup>3</sup>      |
| Imid_17_49  | <chem>[O-]S(=O)(=O)OCCCCCCCC.O=C(OCCC)Cn1cc[n+](C)c1</chem>                    | 49 <sup>6,8</sup>    |
| Imid_25_55  | <chem>[O-]S(=O)(=O)OCCCCCCCC.O=C(OCCC)Cn1cc[n+](C)c1C</chem>                   | 55 <sup>8</sup>      |
| Imid_26_60  | <chem>[O-]S(=O)(=O)OCCCCCCCC.O=C(OCCCC)Cn1cc[n+](C)c1</chem>                   | 60 <sup>3,8,38</sup> |
| Imid_27_56  | <chem>[O-]S(=O)(=O)OCCCCCCCC.O=C(OCCCC)Cn1cc[n+](C)c1C</chem>                  | 56 <sup>8</sup>      |
| Imid_50_54  | <chem>Cn1cc[n+](CCCCOC(C)=O)c1.[O-]S(=O)(=O)OCCCCCCCC</chem>                   | 54 <sup>3</sup>      |
| Imid_52_34  | <chem>Cn1cc[n+](CC(=O)OCCCC)c1.[O-]S(C)(=O)=O</chem>                           | 34 <sup>3</sup>      |
| Imid_69_72  | <chem>Cn1cc[n+](CC(=O)OCCCC)c1.[O-]S(=O)(=O)OCCCCCCCC</chem>                   | 72 <sup>3</sup>      |
| Imid_81_62  | <chem>Cn1cc[n+](CC(=O)OCCOCCC)c1.[O-]S(=O)(=O)OCCCCCCCC</chem>                 | 62                   |
| Imid_82_59  | <chem>Cn1cc[n+](CC(=O)OCCCC)c1.[O-]S(=O)(=O)OCCCCCCCC</chem>                   | 59 <sup>38</sup>     |
| Imid_83_65  | <chem>Cn1cc[n+](CC(=O)OCCOCCOCCC)c1.[O-]S(=O)(=O)OCCCCCCCC</chem>              | 65 <sup>38</sup>     |

|             |                                                                                                                                                                                       |                  |
|-------------|---------------------------------------------------------------------------------------------------------------------------------------------------------------------------------------|------------------|
| Imid_84_63  | <chem>Cn1cc[n+](CC(=O)OCCOCCOCCCC)c1.[O-]S(=O)(=O)OCCCCCCCC</chem>                                                                                                                    | 63 <sup>38</sup> |
| Imid_85_59  | <chem>Cn1cc[n+](CC(=O)OCCOCCOC)c1.[O-]S(=O)(=O)OCCCCCCCC</chem>                                                                                                                       | 59 <sup>38</sup> |
| Imid_86_58  | <chem>Cn1cc[n+](CC(=O)OCCOCCOCC)c1.[O-]S(=O)(=O)OCCCCCCCC</chem>                                                                                                                      | 58 <sup>38</sup> |
| Imid_87_60  | <chem>Cn1cc[n+](CC(=O)OCCOCCCC)c1.[O-]S(=O)(=O)OCCCCCCCC</chem>                                                                                                                       | 60 <sup>38</sup> |
| Imid_88_58  | <chem>Cn1cc[n+](CC(=O)OCCOCC)c1.[O-]S(=O)(=O)OCCCCCCCC</chem>                                                                                                                         | 58 <sup>38</sup> |
| Imid_89_58  | <chem>Cn1cc[n+](CC(=O)OCCOC)c1.[O-]S(=O)(=O)OCCCCCCCC</chem>                                                                                                                          | 58 <sup>38</sup> |
| Imid_90_62  | <chem>Cc1[n+](CC(=O)OCCOCCCC)ccn1C.[O-]S(=O)(=O)OCCCCCCCC</chem>                                                                                                                      | 62 <sup>38</sup> |
| Imid_91_58  | <chem>Cc1[n+](CC(=O)OCCOCCOC)ccn1C.[O-]S(=O)(=O)OCCCCCCCC</chem>                                                                                                                      | 58 <sup>38</sup> |
| Imid_92_38  | <chem>O=C(C[n+]1ccn(C)c1)N1CCCC1.[O-]S(=O)(=O)OCCCCCCCC</chem>                                                                                                                        | 38 <sup>38</sup> |
| Imid_93_35  | <chem>O=C(C[n+]1ccn(C)c1C)N1CCCC1.[O-]S(=O)(=O)OCCCCCCCC</chem>                                                                                                                       | 35 <sup>38</sup> |
| Imid_94_25  | <chem>O=C(C[n+]1ccn(C)c1)N(CCOC)CCOC.[O-]S(=O)(=O)OCCCCCCCC</chem>                                                                                                                    | 25 <sup>38</sup> |
| Imid_131_44 | <chem>[Cl-].[Cl-].[Cl-].[Cl-].CCCCCCCCC[n+]1cn(CC(=O)OCC(COC(=O)Cn2c[n+](CCCCCCCCC)c3ccccc32)(COC(=O)Cn2c[n+](CCCCCCCCC)c3ccccc32)COC(=O)Cn2c[n+](CCCCCCCCC)c3ccccc32)c2cccc21</chem> | 44 <sup>36</sup> |
| Imid_132_47 | <chem>[Cl-].[Cl-].[Cl-].[Cl-].CCCCCCCCC[n+]1cn(CC(=O)OCC(COC(=O)Cn2c[n+](CCCCCCCCC)c3ccccc32)(COC(=O)Cn2c[n+](CCCCCCCCC)c3ccccc32)COC(=O)Cn2c[n+](CCCCCCCCC)c3ccccc32)c2cccc21</chem> | 47 <sup>36</sup> |

#### Data for pyridinium ILs

Table S2: Biodegradability data for pyridinium ILs.

| IL<br>(cation_number_<br>biodegradation<br>rate) | SMILES                                                                        | biodegradation rate in<br>% |
|--------------------------------------------------|-------------------------------------------------------------------------------|-----------------------------|
| Pyri_1_69                                        | <chem>[Br-].OC(=O)C[n+]1ccccc1</chem>                                         | 69 <sup>26</sup>            |
| Pyri_2_5                                         | <chem>COC1=CC=C[N+](CC(O)=O)=C1.[Br-]</chem>                                  | 5 <sup>26</sup>             |
| Pyri_3_7                                         | <chem>CN(C1=CC=[N+](CC(O)=O)C=C1)C.[Br-]</chem>                               | 7 <sup>26</sup>             |
| Pyri_85_54                                       | <chem>O=C(N[C@H](C(OCC)=O)CC1=CC=CC=C1)C[N+]=CC=CC=C2.[Br-]</chem>            | 54 <sup>20,22,23,26</sup>   |
| Pyri_91_47                                       | <chem>COC1=C[N+](CC(N[C@@H](CC2=CC=CC=C2)C(OCC)=O)=O)=CC=C1.[Br-]</chem>      | 47 <sup>22,26</sup>         |
| Pyri_92_32                                       | <chem>CCOC(C1=C[N+](CC(N[C@H](C(OCC)=O)CC2=CC=CC=C2)=O)=CC=C1)=O.[Br-]</chem> | 32 <sup>26</sup>            |
| Pyri_93_37                                       | <chem>OC(C1=CC=C[N+](CC(N[C@@H](CC2=CC=CC=C2)C(OCC)=O)=O)=C1)=O.[Br-]</chem>  | 37 <sup>26</sup>            |
| Pyri_94_56                                       | <chem>CCOC(C1=CC=C[N+](CC(N[C@@H](CC2=CC=CC=C2)C(O)=O)=O)=C1)=O.[Br-]</chem>  | 56 <sup>26</sup>            |
| Pyri_95_33                                       | <chem>CN(C)C1=CC=[N+](CC(N[C@@H](CC2=CC=CC=C2)C(OCC)=O)=O)C=C1.[Br-]</chem>   | 33 <sup>26</sup>            |
| Pyri_96_49                                       | <chem>CCOC([C@H](CC1=CC=C(O)C=C1)NC(C[N+]=CC=CC=C2)=O)=O.[Br-]</chem>         | 49 <sup>22</sup>            |
| Pyri_97_46                                       | <chem>CCOC([C@H](CC1=CC=C(O)C=C1)NC(C[N+]=CC(OC)=CC=C2)=O)=O.[Br-]</chem>     | 46 <sup>22</sup>            |



|             |                                                                                                  |                      |
|-------------|--------------------------------------------------------------------------------------------------|----------------------|
| Pyri_98_31  | CCOC([C@H](CC1=CC=C(O)C=C1)NC(C[N+] <sub>2</sub> =CC=CC(C(OCC)=O)=C <sub>2</sub> )=O)=O.[Br-]    | 31 <sup>22</sup>     |
| Pyri_86_49  | CCCCOC([C@@H](NC(C[N+] <sub>1</sub> =CC=CC=C1)=O)CC <sub>2</sub> =CC=CC=C <sub>2</sub> )=O.[Br-] | 49 <sup>23</sup>     |
| Pyri_87_46  | O=C([C@H](CC1=CC=CC=C1)NC(C[N+] <sub>2</sub> =CC=CC=C <sub>2</sub> )=O)OCCCCC.[Br-]              | 46 <sup>23</sup>     |
| Pyri_88_52  | O=C(N[C@@H](CC1=CC=CC=C1)C(OCCCCCCCC)=O)C[N+] <sub>2</sub> =CC=CC=C <sub>2</sub> . [Br-]         | 52 <sup>23</sup>     |
| Pyri_89_27  | O=C(N[C@@H](CC1=CC=CC=C1)C(OCCCCCCCC)=O)C[N+] <sub>2</sub> =CC=CC=C <sub>2</sub> . [Br-]         | 27 <sup>23,25</sup>  |
| Pyri_90_4   | O=C(N[C@@H](CC1=CC=CC=C1)C(OCCCCCCCC)=O)C[N+] <sub>2</sub> =CC=CC=C <sub>2</sub> . [Br-]         | 4 <sup>23</sup>      |
| Pyri_102_1  | O=C(NCCCC)C(C1=CC=CC=C1)[N+] <sub>2</sub> =CC=CC=C <sub>2</sub> . [Br-]                          | 1 <sup>20</sup>      |
| Pyri_109_4  | [Br-].O\N=C\c1cc[n+](CC(=O)NCCCCCCCC)cc1                                                         | 4 <sup>39</sup>      |
| Pyri_110_9  | [Br-].O\N=C\c1cc[n+](CC(=O)NC(C)C(=O)NCCCCCCCC)cc1                                               | 9 <sup>39</sup>      |
| Pyri_111_24 | [Br-].O\N=C\c1cccc[n+] <sub>1</sub> CC(=O)NC(Cc1cccc1)C(=O)NCCCCCCCC                             | 24 <sup>39</sup>     |
| Pyri_112_20 | [Br-].O\N=C\c1ccc[n+](CC(=O)NC(Cc2cccc2)C(=O)NCCCCCCCC)c1                                        | 20 <sup>39</sup>     |
| Pyri_113_25 | [Br-].O\N=C\c1cc[n+](CC(=O)NC(Cc2cccc2)C(=O)NCCCCCCCC)cc1                                        | 25 <sup>39</sup>     |
| Pyri_5_1    | [n+] <sub>1</sub> (cccc1)CCCC.[Cl-]                                                              | 1 <sup>12,13</sup>   |
| Pyri_33_0   | C1=CC=[N+](C=C1)CC#N.[Cl-]                                                                       | 0 <sup>2</sup>       |
| Pyri_35_1   | CCC[N+] <sub>1</sub> =CC=CC=C1.[Br-]                                                             | 1 <sup>2</sup>       |
| Pyri_36_0   | [n+] <sub>1</sub> (cccc1)CCCC.[Br-]                                                              | 0 <sup>40</sup>      |
| Pyri_39_3   | F[P-](F)(F)(F)F.CCCC[n+] <sub>1</sub> cccc1                                                      | 3 <sup>40</sup>      |
| Pyri_40_3   | CCCC[N+] <sub>1</sub> =CC=CC(=C1)C.[Br-]                                                         | 3 <sup>9,10,40</sup> |
| Pyri_42_9   | [n+] <sub>1</sub> (cccc1)CCCCCCCC.[Br-]                                                          | 9 <sup>40</sup>      |
| Pyri_43_0   | [n+] <sub>1</sub> (cccc1)CCCCCCCCCCCCCCCC.[Br-]                                                  | 0 <sup>40</sup>      |
| Pyri_51_90  | CCCCCCC[N+] <sub>1</sub> =CC=CC(=C1)C.[Br-]                                                      | 90 <sup>10,41</sup>  |
| Pyri_52_10  | CCCCC[N+] <sub>1</sub> =CC=CC(=C1)C.[Br-]                                                        | 10 <sup>41</sup>     |
| Pyri_78_2   | C1=CC=C(C=C1)C[N+] <sub>2</sub> =CC=CC=C <sub>2</sub> . [Br-]                                    | 2 <sup>27</sup>      |
| Pyri_80_0   | CCCC[N+] <sub>1</sub> =CC=CC(=C1)C.C(=[N-])=NC#N                                                 | 0 <sup>29</sup>      |
| Pyri_108_0  | CCCC[N+] <sub>1</sub> =CC=C(C=C1)C.[Cl-]                                                         | 0 <sup>11</sup>      |
| Pyri_24_88  | [n+] <sub>1</sub> (cccc1)CC(=O)OCC.[Br-]                                                         | 88 <sup>40,42</sup>  |
| Pyri_28_76  | [n+] <sub>1</sub> (cc(C(=O)OCCCC)ccc1)C.[I-]                                                     | 76 <sup>40,42</sup>  |
| Pyri_45_88  | [n+] <sub>1</sub> (cccc1)CC(=O)OCC.[P-](F)(F)(F)(F)F                                             | 88 <sup>40</sup>     |
| Pyri_46_75  | [n+] <sub>1</sub> (cc(C(=O)OCCCC)ccc1)C.[P-](F)(F)(F)(F)F                                        | 75 <sup>40</sup>     |
| Pyri_60_37  | CC[n+] <sub>1</sub> cccc(C)c1.FC(F)(F)C(F)(F)C(F)(F)C(F)(F)C(F)(F)C([O-])=O                      | 37 <sup>34</sup>     |

|             |                                                                                           |                     |
|-------------|-------------------------------------------------------------------------------------------|---------------------|
| Pyri_79_25  | CCOC(=O)C1=C[N+](=CC=C1)CC2=CC=CC=C2.[Br-]                                                | 25 <sup>27</sup>    |
| Pyri_99_8   | O=C(OC)C(C1=CC=CC=C1)[N+]2=CC=CC=C2.[Br-]                                                 | 8 <sup>20</sup>     |
| Pyri_100_16 | O=C(OCC)C(C1=CC=CC=C1)[N+]2=CC=CC=C2.[Br-]                                                | 16 <sup>20</sup>    |
| Pyri_101_21 | O=C(OCCCC)C(C1=CC=CC=C1)[N+]2=CC=CC=C2.[Br-]                                              | 21 <sup>20</sup>    |
| Pyri_103_22 | COC1=CC=C[N+](C(C(OCCCC)=O)C2=CC=CC=C2)=C1.[Br-]                                          | 22 <sup>20</sup>    |
| Pyri_104_31 | CCOC(C1=CC=C[N+](C(C(OCCCC)=O)C2=CC=CC=C2)=C1)=O.[Br-]                                    | 31 <sup>20</sup>    |
| Pyri_105_63 | CCCCCCCCCCCC(=O)N(C)CC([O-])=O.CCCC[n+]1cccc1                                             | 63 <sup>32</sup>    |
| Pyri_106_78 | CCCCCCCCCCCC(=O)N(C)CC([O-])=O.CCCCC[n+]1cccc1                                            | 78 <sup>32</sup>    |
| Pyri_107_80 | Cc1cc[n+](CCCCCCCC)cc1C.CCCCCCCCCC(=O)N(C)CC([O-])=O                                      | 80 <sup>32</sup>    |
| Pyri_73_40  | [n+] <sub>1</sub> (cc(O)ccc1)COCCC.[Cl-]                                                  | 40 <sup>43</sup>    |
| Pyri_74_44  | [n+] <sub>1</sub> (cc(O)ccc1)COCCCCCCC.[Cl-]                                              | 44 <sup>43</sup>    |
| Pyri_75_48  | [n+] <sub>1</sub> (cc(O)ccc1)COCCCCCCCCCCC.[Cl-]                                          | 48 <sup>43</sup>    |
| Pyri_76_25  | [Cl-].Oc1ccc[n+](COCCCCCCCCCCCCCCCC)C1                                                    | 25 <sup>43</sup>    |
| Pyri_20_5   | [Cl-].[Cl-].O(CC[n+] <sub>1</sub> cccc1)COCC[n+] <sub>1</sub> cccc1                       | 5 <sup>44</sup>     |
| Pyri_22_3   | F[P-](F)(F)(F)F.F.F[P-](F)(F)(F)F.O(CC[n+] <sub>1</sub> cccc1)COCC[n+] <sub>1</sub> cccc1 | 3 <sup>44</sup>     |
| Pyri_32_51  | C1=CC=[N+](C=C1)CCO.[Cl-]                                                                 | 51 <sup>2</sup>     |
| Pyri_34_65  | c1cc[n+](cc1)CCO.[I-]                                                                     | 65 <sup>2</sup>     |
| Pyri_15_32  | CCCCCCCCOS(=O)(=O)[O-].CCCC[n+] <sub>1</sub> cccc(c1)COC                                  | 32 <sup>44</sup>    |
| Pyri_16_31  | CCCCCCCC[n+] <sub>1</sub> cccc(c1)COC.CCCCCCCOS(=O)(=O)[O-]                               | 31 <sup>44</sup>    |
| Pyri_17_36  | CCCCCCCCOS(=O)(=O)[O-].CCCC[n+] <sub>1</sub> cccc(c1)COCC                                 | 36 <sup>44</sup>    |
| Pyri_18_47  | CCCCCCCCOS(=O)(=O)[O-].CCOC(=O)C[n+] <sub>1</sub> cccc(c1)COC                             | 47 <sup>44</sup>    |
| Pyri_19_51  | COCc1ccc[n+](CC(=O)OCCCC)c1.[O-]S(=O)(=O)OCCCCCCCC                                        | 51 <sup>44</sup>    |
| Pyri_25_89  | [n+] <sub>1</sub> (cccc1)CC(=O)OCC.[O-]S(=O)(=O)OCCCCCCCC                                 | 89 <sup>40,42</sup> |
| Pyri_26_75  | [n+] <sub>1</sub> (cc(C(=O)OCCCC)ccc1)C.[O-]S(=O)(=O)OCCCCCCCC                            | 75 <sup>40,42</sup> |
| Pyri_30_30  | CCCCCCCCOS(=O)(=O)[O-].CCCCNC(=O)c1ccc[n+](c1)CCCC                                        | 30 <sup>40,42</sup> |
| Pyri_37_40  | CCCCCCCCS(=O)(=O)[O-].CCCC[N+] <sub>1</sub> =CC=CC=C1                                     | 40 <sup>40</sup>    |
| Pyri_41_37  | CCCCCCCCOS(=O)(=O)[O-].CCCC[n+] <sub>1</sub> cccc(c1)C                                    | 37 <sup>40</sup>    |
| Pyri_47_82  | [O-]S(=O)(=O)OCCCCCCCC.O=C(OCCCC)c1ccc[n+](CCCC)c1                                        | 82 <sup>40,42</sup> |
| Pyri_61_24  | [n+] <sub>1</sub> (cc(O)ccc1)COCCC.[N-]1C(=O)C=C(C)OS1(=O)=O                              | 24 <sup>43</sup>    |
| Pyri_62_22  | [n+] <sub>1</sub> (cc(O)ccc1)COCCCC.[N-]1C(=O)C=C(C)OS1(=O)=O                             | 22 <sup>43</sup>    |

|            |                                                                                                             |                     |
|------------|-------------------------------------------------------------------------------------------------------------|---------------------|
| Pyri_63_39 | [n+1](cc(O)ccc1)COCCCCC.[N-]1C(=O)C=C(C)OS1(=O)=O                                                           | 39 <sup>43</sup>    |
| Pyri_64_41 | [n+1](cc(O)ccc1)COCCCCC.[N-]1C(=O)C=C(C)OS1(=O)=O                                                           | 41 <sup>43</sup>    |
| Pyri_65_49 | [n+1](cc(O)ccc1)COCCCCCCCCC.[N-]1C(=O)C=C(C)OS1(=O)=O                                                       | 49 <sup>43</sup>    |
| Pyri_66_32 | [n+1](cc(O)ccc1)COCCCCCCCCCCCCC.[N-]1C(=O)C=C(C)OS1(=O)=O                                                   | 32 <sup>43</sup>    |
| Pyri_67_43 | [n+1](cc(O)ccc1)COCCC.[N-]1C(=O)c2cccc2S1(=O)=O                                                             | 43 <sup>43</sup>    |
| Pyri_68_13 | [n+1](cc(O)ccc1)COCCC.[N-]1C(=O)c2cccc2S1(=O)=O                                                             | 13 <sup>43</sup>    |
| Pyri_69_31 | [n+1](cc(O)ccc1)COCCCCC.[N-]1C(=O)c2cccc2S1(=O)=O                                                           | 31 <sup>43</sup>    |
| Pyri_70_32 | [n+1](cc(O)ccc1)COCCCCC.[N-]1C(=O)c2cccc2S1(=O)=O                                                           | 32 <sup>43</sup>    |
| Pyri_71_72 | [n+1](cc(O)ccc1)COCCCCCCCCC.[N-]1C(=O)c2cccc2S1(=O)=O                                                       | 72 <sup>43</sup>    |
| Pyri_72_20 | [n+1](cc(O)ccc1)COCCCCCCCCCCCCC.[N-]1C(=O)c2cccc2S1(=O)=O                                                   | 20 <sup>43</sup>    |
| Pyri_11_71 | CCCCOC(=O)c1ccc[n+](c1)CCO.C(F)(F)(F)S(=O)(=O)[N-]S(=O)(=O)C(F)(F)F                                         | 71 <sup>44</sup>    |
| Pyri_12_62 | c1cc[n+](cc1)CCO.C(F)(F)(F)S(=O)(=O)[N-]S(=O)(=O)C(F)(F)F                                                   | 62 <sup>44</sup>    |
| Pyri_13_1  | FC(F)(F)S(=O)(=O)[N-]S(=O)(=O)C(F)(F)F.CCOC[n+1]cccc(CCCC)c1                                                | 1 <sup>44</sup>     |
| Pyri_14_6  | COCc1ccc[n+](c1)CCO.C(F)(F)(F)S(=O)(=O)[N-]S(=O)(=O)C(F)(F)F                                                | 6 <sup>44</sup>     |
| Pyri_21_4  | FC(F)(F)S(=O)(=O)[N-]S(=O)(=O)C(F)(F)F.FC(F)(F)S(=O)(=O)[N-]S(=O)(=O)C(F)(F)F.O(CC[n+1]cccc1)COCC[n+1]cccc1 | 4 <sup>44</sup>     |
| Pyri_23_3  | CCCNC(=O)OCC[n+1]cccc1.C(F)(F)(F)S(=O)(=O)[N-]S(=O)(=O)C(F)(F)F                                             | 3 <sup>44</sup>     |
| Pyri_29_68 | [n+1](cc(C(=O)OCCCC)ccc1)C.[N-](S(=O)(=O)C(F)(F)S(=O)(=O)C(F)(F)F                                           | 68 <sup>40,42</sup> |
| Pyri_38_0  | CCCC[N+1]=CC=CC=C1.C(F)(F)(F)S(=O)(=O)[N-]S(=O)(=O)C(F)(F)F                                                 | 0 <sup>40</sup>     |
| Pyri_44_64 | [n+1](cccc1)CC(=O)OCC.[N-](S(=O)(=O)C(F)(F)S(=O)(=O)C(F)(F)F                                                | 64 <sup>40</sup>    |
| Pyri_53_0  | C=CC[n+1]cccc1.FC(F)(F)S(=O)(=O)[N-]S(=O)(=O)C(F)(F)F                                                       | 0 <sup>45</sup>     |
| Pyri_54_1  | FC(F)(F)S(=O)(=O)[N-]S(=O)(=O)C(F)(F)F.c1cccc1C[n+1]cccc1                                                   | 1 <sup>45</sup>     |
| Pyri_55_0  | FC(F)(F)S(=O)(=O)[N-]S(=O)(=O)C(F)(F)F.CC(C)N(CC[n+1]cccc1)C(C)C                                            | 0 <sup>45</sup>     |
| Pyri_56_3  | FC(F)(F)S(=O)(=O)[N-]S(=O)(=O)C(F)(F)F.CCN(CC)Cc1ccc[n+](CCCC)c1                                            | 3 <sup>45</sup>     |
| Pyri_57_3  | CCCC[N+1]=CC=CC(=C1)C.C(F)(F)(F)S(=O)(=O)[N-]S(=O)(=O)C(F)(F)F                                              | 3 <sup>45</sup>     |
| Pyri_58_60 | OC(=O)Cc1ccc[n+](CCCC)c1.FC(F)(F)S(=O)(=O)[N-]S(=O)(=O)C(F)(F)F                                             | 60 <sup>45</sup>    |

## Data for QACs

Table S3: Biodegradability data for QACs.

| IL<br>(cation_number_<br>biodegradation<br>rate) | SMILES                                                                             | biodegradation rate in<br>% |
|--------------------------------------------------|------------------------------------------------------------------------------------|-----------------------------|
| QAC_171_92                                       | <chem>[Cl-].O=C(OCC)[C@@H]([NH3+])Cc1ccccc1</chem>                                 | 92 <sup>23</sup>            |
| QAC_172_99                                       | <chem>[Cl-].O=C(OCCCC)[C@@H]([NH3+])Cc1ccccc1</chem>                               | 99 <sup>23</sup>            |
| QAC_173_85                                       | <chem>[Cl-].O=C(OCCCCC)[C@@H]([NH3+])Cc1ccccc1</chem>                              | 85 <sup>23</sup>            |
| QAC_174_79                                       | <chem>[Cl-].O=C(OCCCCCCC)[C@@H]([NH3+])Cc1ccccc1</chem>                            | 79 <sup>23</sup>            |
| QAC_175_50                                       | <chem>[Cl-].O=C(OCCCCCCCC)[C@@H]([NH3+])Cc1ccccc1</chem>                           | 50 <sup>23</sup>            |
| QAC_176_65                                       | <chem>[Cl-].O=C(OCCCCCCCCC)[C@@H]([NH3+])Cc1ccccc1</chem>                          | 65 <sup>23</sup>            |
| QAC_177_67                                       | <chem>[Cl-].O=C(OCCCCCCCCCCC)[C@@H]([NH3+])Cc1ccccc1</chem>                        | 67 <sup>23</sup>            |
| QAC_178_52                                       | <chem>[Cl-].O=C(OCCCCCCCCCCCC)[C@@H]([NH3+])Cc1ccccc1</chem>                       | 52 <sup>23</sup>            |
| QAC_20_86                                        | <chem>[O-]C=O.[NH3+]CCO</chem>                                                     | 86 <sup>12</sup>            |
| QAC_21_95                                        | <chem>CCCC(=O)[O-].[NH3+]CCO</chem>                                                | 95 <sup>12</sup>            |
| QAC_22_13                                        | <chem>O=C[O-].OCC[NH2+]CCO</chem>                                                  | 13 <sup>12</sup>            |
| QAC_23_69                                        | <chem>O=C([O-])C.OCC[NH2+]CCO</chem>                                               | 69 <sup>12</sup>            |
| QAC_24_68                                        | <chem>O=C([O-])CC.OCC[NH2+]CCO</chem>                                              | 68 <sup>12</sup>            |
| QAC_25_78                                        | <chem>O=C([O-])CCC.OCC[NH2+]CCO</chem>                                             | 78 <sup>12</sup>            |
| QAC_26_71                                        | <chem>O=C([O-])C(C)C.OCC[NH2+]CCO</chem>                                           | 71 <sup>12</sup>            |
| QAC_27_57                                        | <chem>O=C([O-])CCCC.OCC[NH2+]CCO</chem>                                            | 57 <sup>12</sup>            |
| QAC_28_37                                        | <chem>OCC[NH+](CCO)CCO.[O-]C(=O)CCC</chem>                                         | 37 <sup>12</sup>            |
| QAC_29_38                                        | <chem>OCC[NH+](CCO)CCO.[O-]C(=O)CCCC</chem>                                        | 38 <sup>12</sup>            |
| QAC_112_70                                       | <chem>COCCOCCOCCOCC([O-])=O.[NH3+]CCCCCCCCCCC</chem>                               | 70 <sup>18</sup>            |
| QAC_13_4                                         | <chem>FC(F)(F)S(=O)(=O)[N-]S(=O)(=O)C(F)(F)F.CCCCCC[N+](C)(C)CCN(C)C</chem>        | 4 <sup>45</sup>             |
| QAC_14_6                                         | <chem>FC(F)(F)S(=O)(=O)[N-]S(=O)(=O)C(F)(F)F.CC[N+](CC)(CCCC)CCO</chem>            | 6 <sup>45</sup>             |
| QAC_15_3                                         | <chem>FC(F)(F)S(=O)(=O)[N-]S(=O)(=O)C(F)(F)F.CCCC[N+](CCCC)(CCO)CCO</chem>         | 3 <sup>45</sup>             |
| QAC_19_0                                         | <chem>FC(F)(F)S(=O)(=O)[N-]S(=O)(=O)C(F)(F)F.CCCCCCC[N+](C)(CCCCCCC)CCCCCCC</chem> | 0 <sup>13</sup>             |
| QAC_16_51                                        | <chem>C[N+](C)(C)CCCC.[O-]S(C)(=O)=O</chem>                                        | 51 <sup>46,47</sup>         |
| QAC_17_4                                         | <chem>C[N+](CC)(CC)CC.[O-]S(=O)(=O)OC</chem>                                       | 4 <sup>46</sup>             |

|            |                                                                             |                   |
|------------|-----------------------------------------------------------------------------|-------------------|
| QAC_18_7   | C[N+](CCCC)(CCCC)CCCC.[O-]S(C)(=O)=O                                        | 7 <sup>47</sup>   |
| QAC_110_67 | CC[NH2+]<br>CC.[O-]C(C)=O                                                   | 67 <sup>35</sup>  |
| QAC_111_61 | CC[NH+](CC)CC.[O-]C(C)=O                                                    | 61 <sup>35</sup>  |
| QAC_89_18  | CC[N+](CC)(CC)CC.[O-]C(=O)C(N)CS                                            | 18 <sup>21</sup>  |
| QAC_90_19  | [O-]C(=O)C(N)CS.CCCC[N+](CCCC)(CCCC)CCCC                                    | 19 <sup>21</sup>  |
| QAC_146_18 | [O-]C(=O)[C@@H]1CCCN1.CCCC[N+](CCCC)(CCCC)CCCC                              | 18 <sup>48</sup>  |
| QAC_148_24 | [O-]C(=O)[C@@H]1C[C@@H](O)CN1.CCCC[N+](CCCC)(CCCC)CCCC                      | 24 <sup>48</sup>  |
| QAC_5_21   | [N+](CCCC)(CCCC)(CCCC)CCCC.[O-]C(=O)[C@@H]1[C@@H](O)[C@H](O)[C@@H](O)C(O)O1 | 21 <sup>49</sup>  |
| QAC_7_16   | [O-]C(=O)[C@H](C)O.CCCC[N+](CCCC)(CCCC)CCCC                                 | 16 <sup>49</sup>  |
| QAC_8_16   | [O-]C(=O)[C@@H](O)[C@H](O)C(O)=O.CCCC[N+](CCCC)(CCCC)CCCC                   | 16 <sup>49</sup>  |
| QAC_9_14   | [O-]C(=O)[C@@H](O)CC(=O)O.CCCC[N+](CCCC)(CCCC)CCCC                          | 14 <sup>49</sup>  |
| QAC_10_1   | [O-]C(=O)CCC(=O)O.CCCC[N+](CCCC)(CCCC)CCCC                                  | 1 <sup>49</sup>   |
| QAC_11_10  | CCCC[N+](CCCC)(CCCC)CCCC.[O-]C(=O)CC(O)=O                                   | 10 <sup>49</sup>  |
| QAC_12_12  | CC(=O)C([O-])=O.CCCC[N+](CCCC)(CCCC)CCCC                                    | 12 <sup>49</sup>  |
| QAC_80_83  | CCCC[N+](CCCC)(CCCC)CCCC.[O-]C(=O)CCCCCCCC                                  | 83 <sup>50</sup>  |
| QAC_142_72 | C[N+](C)(CCCC)CCCC.[O-]C(=O)C(C)O                                           | 72 <sup>51</sup>  |
| QAC_143_69 | O=C([O-])CC(O)(CC(=O)[O-])C([O-])=O.CCCC[N+](C)(C)CCCC                      | 69 <sup>51</sup>  |
| QAC_63_5   | CCCCCCCCC[N+](C)(C)CCCCCCCCC.[O-]C(=O)CCCCCCCCCCCCCCCCC                     | 5 <sup>52</sup>   |
| QAC_64_87  | CCCCCCCCC[N+](C)(C)CCCCCCCCC.[O-]C(=O)CCCCCCC\C=C\CCCCCCCC                  | 87 <sup>52</sup>  |
| QAC_71_100 | CCCCCCCCCCCCCCCC[N+](C)(C)C.[O-]C(=O)CCCCCCCCCCCCCCCCC                      | 100 <sup>52</sup> |
| QAC_72_100 | CCCCCCCCCCCCCCCC[N+](C)(C)C.[O-]C(=O)CCCCCCC\C=C\CCCCCCCC                   | 100 <sup>52</sup> |
| QAC_79_11  | C=CC[N+](C)(C)CC=C.[O-]C(=O)CCCCCCCC                                        | 11 <sup>50</sup>  |
| QAC_82_41  | CCCCCCCCCCCCCCCC[N+](C)(C)C.[O-]C(=O)CCCCCCCC                               | 41 <sup>50</sup>  |
| QAC_139_77 | C[N+](C)(CCCC)CCCC.[O-]C(C)=O                                               | 77 <sup>51</sup>  |
| QAC_140_66 | C[N+](C)(CCCC)CCCC.CC(=O)CCC([O-])=O                                        | 66 <sup>51</sup>  |
| QAC_141_45 | [O-]C(=O)C(=C)CC([O-])=O.CCCC[N+](C)(C)CCCC                                 | 45 <sup>51</sup>  |
| QAC_144_54 | C[N+](C)(CCCC)CCCC.[O-]C(=O)\C=C\C=C\C                                      | 54 <sup>51</sup>  |
| QAC_145_69 | C[N+](C)(CCCC)CCCC.[O-]C(=O)CCC([O-])=O                                     | 69 <sup>51</sup>  |
| QAC_2_0    | [Br-].CC[N+](CC)(CC)CC                                                      | 0 <sup>49</sup>   |
| QAC_3_4    | [OH-].CCCC[N+](CCCC)(CCCC)CCCC                                              | 4 <sup>49</sup>   |

|            |                                          |                   |
|------------|------------------------------------------|-------------------|
| QAC_4_4    | [Br-].CCCC[N+](CCCC)(CCCC)CCCC           | 4 <sup>1,49</sup> |
| QAC_43_70  | C[N+](C)(CCCCCCCC)CCCCCCCC.[O-]N=O       | 70 <sup>53</sup>  |
| QAC_138_5  | [Cl-].CCCC[N+](C)(C)CCCC                 | 5 <sup>51</sup>   |
| QAC_170_16 | CCCCCCCCCCCC[N+](C)(C)CC1=CC=CC=C1.[Cl-] | 16 <sup>11</sup>  |
| QAC_1_3    | [Br-].C[N+](C)(C)C                       | 3 <sup>49</sup>   |

### Data for cholinium ILS

Table S4: Biodegradability data for cholinium ILS.

| IL<br>(cation_number_<br>biodegradation<br>rate) | SMILES                                                    | biodegradation rate in<br>% |
|--------------------------------------------------|-----------------------------------------------------------|-----------------------------|
| Chol_31_82                                       | OCC[N+](C)(C)C.[O-]S(C)(=O)=O                             | 82 <sup>46,47</sup>         |
| Chol_32_22                                       | COCC[N+](C)(C)C.[O-]S(C)(=O)=O                            | 22 <sup>46</sup>            |
| Chol_35_52                                       | FC(F)(C(F)(F)S([O-])(=O)=O)C(F)(F)C(F)(F)F.C[N+](C)(C)CCO | 52 <sup>34</sup>            |
| Chol_34_25                                       | C[N+](C)(C)CCOCC.CC(=O)CCC([O-])=O                        | 25 <sup>33</sup>            |
| Chol_55_70                                       | C[N+](C)(C)CC(=O)OCC.CC(=O)CCC([O-])=O                    | 70 <sup>33</sup>            |
| Chol_60_73                                       | [Cl-].C[N+](C)(C)CCOC(=O)C=C                              | 73 <sup>54</sup>            |
| Chol_61_70                                       | [Cl-].C[N+](C)(C)CCOC(=O)C(=C)C                           | 70 <sup>54</sup>            |
| Chol_37_100                                      | O=C([O-])CCCCCCCCC.C[N+](C)(C)CCO                         | 100 <sup>55</sup>           |
| Chol_38_80                                       | O=C([O-])CCCCCCCCCCCC.C[N+](C)(C)CCO                      | 80 <sup>55</sup>            |
| Chol_39_85                                       | O=C([O-])CCCCCCCCCCCCC.C[N+](C)(C)CCO                     | 85 <sup>55</sup>            |
| Chol_40_80                                       | O=C([O-])CCCCCCCCCCCCCCCC.C[N+](C)(C)CCO                  | 80 <sup>55</sup>            |
| Chol_53_74                                       | O=C([O-])CN(C)C(=O)CCCCCCCCC.C[N+](C)(C)CCO               | 74 <sup>32</sup>            |
| Chol_77_85                                       | C[N+](C)(CCCCCCCCCCCC)CC(=O)O.[O-]C(=O)CCCCCCCC           | 85 <sup>50</sup>            |
| Chol_2_73                                        | O=C([O-])C(C)N.C[N+](C)(C)CCO                             | 73 <sup>56,57</sup>         |
| Chol_3_69                                        | O=C([O-])C(N)C(C)C.C[N+](C)(C)CCO                         | 69 <sup>56</sup>            |
| Chol_4_72                                        | O=C([O-])C(N)CC(C)C.C[N+](C)(C)CCO                        | 72 <sup>56</sup>            |
| Chol_5_72                                        | O=C([O-])C(N)C(C)CC.C[N+](C)(C)CCO                        | 72 <sup>56</sup>            |
| Chol_6_76                                        | OCC(N)C([O-])=O.C[N+](C)(C)CCO                            | 76 <sup>56,57</sup>         |
| Chol_7_73                                        | OCC[N+](C)(C)C.[O-]C(=O)C(N)C(C)O                         | 73 <sup>56,57</sup>         |
| Chol_8_65                                        | [O-]C(=O)C(N)CCSC.C[N+](C)(C)CCO                          | 65 <sup>56,57</sup>         |
| Chol_9_82                                        | OC(=O)CC(N)C([O-])=O.C[N+](C)(C)CCO                       | 82 <sup>21,56,57</sup>      |

|            |                                                                               |                        |
|------------|-------------------------------------------------------------------------------|------------------------|
| Chol_10_84 | <chem>OC(=O)CCC(N)C([O-])=O.C[N+](C)(C)CCO</chem>                             | 84 <sup>56,57</sup>    |
| Chol_11_86 | <chem>O=C([O-])C(N)CC(N)=O.C[N+](C)(C)CCO</chem>                              | 86 <sup>56</sup>       |
| Chol_12_84 | <chem>O=C([O-])C(N)CCC(N)=O.C[N+](C)(C)CCO</chem>                             | 84 <sup>56</sup>       |
| Chol_13_67 | <chem>O=C([O-])C(N)CCCCN.C[N+](C)(C)CCO</chem>                                | 67 <sup>56</sup>       |
| Chol_30_67 | <chem>OCC[N+](C)(C)C.[O-]C(=O)C(N)CS</chem>                                   | 67 <sup>21</sup>       |
| Chol_1_74  | <chem>O=C([O-])CN.C[N+](C)(C)CCO</chem>                                       | 74 <sup>21,56</sup>    |
| Chol_18_68 | <chem>O=C([O-])C.C[N+](C)(C)CCO</chem>                                        | 68 <sup>35,56</sup>    |
| Chol_19_68 | <chem>NC(Cc1ccccc1)C([O-])=O.C[N+](C)(C)CCO</chem>                            | 68 <sup>21,56,57</sup> |
| Chol_20_69 | <chem>OCC[N+](C)(C)C.[O-]C(=O)C1CCCC1</chem>                                  | 69 <sup>28</sup>       |
| Chol_21_69 | <chem>[O-]C(=O)CC1CCCC1.C[N+](C)(C)CCO</chem>                                 | 69 <sup>28</sup>       |
| Chol_22_69 | <chem>[O-]C(=O)C1CCCCC1.C[N+](C)(C)CCO</chem>                                 | 69 <sup>28</sup>       |
| Chol_23_73 | <chem>C[N+](C)(C)CCO.[O-]C(=O)CCC1CCCCC1</chem>                               | 73 <sup>28</sup>       |
| Chol_24_71 | <chem>[O-]C(=O)c1ccccc1.C[N+](C)(C)CCO</chem>                                 | 71 <sup>28</sup>       |
| Chol_25_60 | <chem>O=C([O-])c1ccccc1O.C[N+](C)(C)CCO</chem>                                | 60 <sup>28</sup>       |
| Chol_26_42 | <chem>C[N+](C)(C)CCO.[O-]C(=O)COc1ccc2ccccc2c1</chem>                         | 42 <sup>28</sup>       |
| Chol_27_49 | <chem>C[N+](C)(C)CCO.[O-]C(=O)c1c2ccccc2cc2ccccc21</chem>                     | 49 <sup>28</sup>       |
| Chol_33_70 | <chem>CC(=O)CCC([O-])=O.C[N+](C)(C)CCO</chem>                                 | 70 <sup>33</sup>       |
| Chol_36_56 | <chem>O=C([O-])C(F)(F)C(F)(F)C(F)(F)C(F)(F)C(F)(F)F.C[N+](C)(C)CCO</chem>     | 56 <sup>34</sup>       |
| Chol_44_5  | <chem>OCC[N+](C)(C)CC(N[C@@H](CC1=CC=CC=C1)C(O)=O)=O.[Br-]</chem>             | 5 <sup>26</sup>        |
| Chol_45_19 | <chem>OCC[N+](C)(C)CC(N[C@@H](CC1=CC=CC=C1)C(OCC)=O)=O.[Br-]</chem>           | 19 <sup>22,23,26</sup> |
| Chol_46_21 | <chem>O=C([C@H](CC1=CC=CC=C1)NC(C[N+](C)(CCO)C)=O)OCCCC.[Br-]</chem>          | 21 <sup>23</sup>       |
| Chol_47_30 | <chem>O=C([C@H](CC1=CC=CC=C1)NC(C[N+](C)(CCO)C)=O)OCCCCC.[Br-]</chem>         | 30 <sup>23</sup>       |
| Chol_48_36 | <chem>OCC[N+](C)(C)CC(N[C@@H](CC1=CC=CC=C1)C(OCCCCCCC)=O)=O.[Br-]</chem>      | 36 <sup>23</sup>       |
| Chol_49_37 | <chem>OCC[N+](C)(CC(N[C@@H](CC1=CC=CC=C1)C(OCCCCCCCCC)=O)=O)C.[Br-]</chem>    | 37 <sup>23,25</sup>    |
| Chol_50_20 | <chem>OCC[N+](C)(CC(N[C@@H](CC1=CC=CC=C1)C(OCCCCCCCCCCCC)=O)=O)C.[Br-]</chem> | 20 <sup>23</sup>       |
| Chol_51_20 | <chem>CCOC([C@H](CC1=CC=C(O)C=C1)NC(C[N+](C)(C)CCO)=O)=O.[Br-]</chem>         | 20 <sup>22</sup>       |
| Chol_71_70 | <chem>CC[N+](C)(C)CCO.[O-]C(=O)CCCc1c[NH]c2ccccc21</chem>                     | 70 <sup>58</sup>       |
| Chol_72_46 | <chem>CCCC[N+](C)(C)CCO.[O-]C(=O)CCCc1c[NH]c2ccccc21</chem>                   | 46 <sup>58</sup>       |
| Chol_73_43 | <chem>CCCCCC[N+](C)(C)CCO.[O-]C(=O)CCCc1c[NH]c2ccccc21</chem>                 | 43 <sup>58</sup>       |
| Chol_74_44 | <chem>CCCCCCCC[N+](C)(C)CCO.[O-]C(=O)CCCc1c[NH]c2ccccc21</chem>               | 44 <sup>58</sup>       |
| Chol_75_51 | <chem>CCCCCCCCCC[N+](C)(C)CCO.[O-]C(=O)CCCc1c[NH]c2ccccc21</chem>             | 51 <sup>58</sup>       |
| Chol_76_60 | <chem>CCCCCCCCCCCC[N+](C)(C)CCO.[O-]C(=O)CCCc1c[NH]c2ccccc21</chem>           | 60 <sup>58</sup>       |

|            |                                                                                                                        |                        |
|------------|------------------------------------------------------------------------------------------------------------------------|------------------------|
| Chol_28_78 | <chem>C[N+](C)(C)CCO.[O-]C(=O)CC[C@H](C)[C@H]1CC[C@H]2[C@@H]3CC[C@H]4C[C@H](O)CC[C@]4(C)[C@H]3C[C@H](O)[C@@]21C</chem> | 78 <sup>28</sup>       |
| Chol_29_83 | <chem>C[N+](C)(C)CCO.[O-]C(=O)CCC(C)C1CC[C@H]2[C@@H]3CC[C@H]4C[C@H](O)CC[C@]4(C)[C@H]3CCC12C</chem>                    | 83 <sup>28</sup>       |
| Chol_14_66 | <chem>NC(Cc1cnc[NH]1)C([O-])=O.C[N+](C)(C)CCO</chem>                                                                   | 66 <sup>21,56,57</sup> |
| Chol_15_70 | <chem>O=C([O-])C(N)CCCNC(=N)N.C[N+](C)(C)CCO</chem>                                                                    | 70 <sup>56,57</sup>    |
| Chol_16_68 | <chem>OCC[N+](C)(C)C.[O-]C(=O)C1CCCN1</chem>                                                                           | 68 <sup>21,56</sup>    |
| Chol_17_71 | <chem>C[N+](C)(C)CCO.[O-]C(=O)C(N)Cc1c[NH]c2ccccc21</chem>                                                             | 71 <sup>56,57</sup>    |
| Chol_52_94 | <chem>C[N+](C)(C)CCO.[O-]C(=O)CCCc1c[NH]c2ccccc21</chem>                                                               | 94 <sup>58</sup>       |
| Chol_88_81 | <chem>[Br-].CC(=O)OCC1OC(OCC[N+](C)(C)C)C(OC(C)=O)C(OC(C)=O)C1OC(C)=O</chem>                                           | 81 <sup>59</sup>       |
| Chol_89_57 | <chem>[Br-].CC(=O)OCC1OC(OCC[N+](C)(C)CCCCCCCCCCC)C(OC(C)=O)C(OC(C)=O)C1OC(C)=O</chem>                                 | 57 <sup>59</sup>       |
| Chol_90_31 | <chem>[Br-].CC(=O)OCC1OC(OCC[N+](C)(C)CCCCCCCCCCCCCCC)C(OC(C)=O)C(OC(C)=O)C1OC(C)=O</chem>                             | 31 <sup>59</sup>       |
| Chol_67_72 | <chem>Clc1cc(Cl)ccc1OCC([O-])=O.CCCCCCCCCCCC[N+](C)(C)CC(=O)O</chem>                                                   | 72 <sup>60</sup>       |
| Chol_68_59 | <chem>Clc1cc(C)c(OCC([O-])=O)cc1.CCCCCCCCCCCC[N+](C)(C)CC(=O)O</chem>                                                  | 59 <sup>60</sup>       |
| Chol_69_51 | <chem>Clc1cc(C)c(OC(C)C([O-])=O)cc1.CCCCCCCCCCCC[N+](C)(C)CC(=O)O</chem>                                               | 51 <sup>60</sup>       |
| Chol_70_42 | <chem>COc1c(c(Cl)ccc1Cl)C([O-])=O.CCCCCCCCCCCC[N+](C)(C)CC(=O)O</chem>                                                 | 42 <sup>60</sup>       |
| Chol_62_37 | <chem>Clc1cc(C)c(OCC([O-])=O)cc1.C=CC(=O)OCC[N+](C)(C)C</chem>                                                         | 37 <sup>54</sup>       |
| Chol_63_29 | <chem>Clc1cc(C)c(OCC([O-])=O)cc1.C=C(C)C(=O)OCC[N+](C)(C)C</chem>                                                      | 29 <sup>54</sup>       |
| Chol_64_90 | <chem>COc1c(c(Cl)ccc1Cl)C([O-])=O.CC(=O)OCC[N+](C)(C)C</chem>                                                          | 90 <sup>61</sup>       |
| Chol_65_70 | <chem>Clc1cc(Cl)ccc1OCC([O-])=O.CC(=O)OCC[N+](C)(C)C</chem>                                                            | 70 <sup>61</sup>       |
| Chol_66_80 | <chem>Clc1cc(C)c(OCC([O-])=O)cc1.CC(=O)OCC[N+](C)(C)C</chem>                                                           | 80 <sup>61</sup>       |
| Chol_56_87 | <chem>Clc1cc(Cl)ccc1OCC([O-])=O.C[N+](C)(C)CC(=O)O</chem>                                                              | 87 <sup>62</sup>       |
| Chol_57_69 | <chem>Clc1cc(C)c(OCC([O-])=O)cc1.C[N+](C)(C)CC(=O)O</chem>                                                             | 69 <sup>62</sup>       |
| Chol_58_57 | <chem>Clc1cc(C)c(OC(C)C([O-])=O)cc1.C[N+](C)(C)CC(=O)O</chem>                                                          | 57 <sup>62</sup>       |
| Chol_59_48 | <chem>COc1c(c(Cl)ccc1Cl)C([O-])=O.C[N+](C)(C)CC(=O)O</chem>                                                            | 48 <sup>62</sup>       |
| Chol_78_76 | <chem>Clc1cc(Cl)ccc1OCC([O-])=O.O=C(O)CC(O)C[N+](C)(C)C</chem>                                                         | 76 <sup>62</sup>       |
| Chol_79_59 | <chem>Clc1cc(C)c(OCC([O-])=O)cc1.O=C(O)CC(O)C[N+](C)(C)C</chem>                                                        | 59 <sup>62</sup>       |
| Chol_80_49 | <chem>Clc1cc(C)c(OC(C)C([O-])=O)cc1.O=C(O)CC(O)C[N+](C)(C)C</chem>                                                     | 49 <sup>62</sup>       |
| Chol_81_44 | <chem>COc1c(c(Cl)ccc1Cl)C([O-])=O.O=C(O)CC(O)C[N+](C)(C)C</chem>                                                       | 44 <sup>62</sup>       |



## Data for phosphonium ILS

Table S5: Biodegradability data for phosphonium ILS.

| IL<br>(cation_number_<br>biodegradation<br>rate) | SMILES                                                                               | biodegradation rate in<br>% |
|--------------------------------------------------|--------------------------------------------------------------------------------------|-----------------------------|
| Phos_28_0                                        | [P+](CCCCC)(CCCCC)(CCCCC)CC=C.[N-](S(=O)(=O)C(F)(F)F)S(=O)(=O)C(F)(F)F               | 0 <sup>63</sup>             |
| Phos_30_0                                        | [P+](CCCCC)(CCCCC)(CCCCC)COC.[N-](S(=O)(=O)C(F)(F)F)S(=O)(=O)C(F)(F)F                | 0 <sup>63</sup>             |
| Phos_32_0                                        | [P+](CCCCC)(CCCCC)(CCCCC)CCO.[N-](S(=O)(=O)C(F)(F)F)S(=O)(=O)C(F)(F)F                | 0 <sup>63</sup>             |
| Phos_20_0                                        | [P+](CCCCC)(CCCCC)(CCCCC)CC(=O)OCCC.[N-](S(=O)(=O)C(F)(F)F)S(=O)(=O)C(F)(F)F         | 0 <sup>63</sup>             |
| Phos_22_2                                        | [P+](CCCCC)(CCCCC)(CCCCC)CC(=O)OCCCC.[N-](S(=O)(=O)C(F)(F)F)S(=O)(=O)C(F)(F)F        | 2 <sup>63</sup>             |
| Phos_24_0                                        | [P+](CCCCC)(CCCCC)(CCCCC)CC(=O)OCCCCC.[N-](S(=O)(=O)C(F)(F)F)S(=O)(=O)C(F)(F)F       | 0 <sup>63</sup>             |
| Phos_26_0                                        | [P+](CCCCC)(CCCCC)(CCCCC)CCCCOC(=O)C.[N-](S(=O)(=O)C(F)(F)F)S(=O)(=O)C(F)(F)F        | 0 <sup>63</sup>             |
| Phos_5_7                                         | [P+](C1CCCC1)(C1CCCC1)(C1CCCC1)CC(=O)OCCC.[N-](S(=O)(=O)C(F)(F)F)S(=O)(=O)C(F)(F)F   | 7 <sup>63</sup>             |
| Phos_7_2                                         | [P+](C1CCCC1)(C1CCCC1)(C1CCCC1)CC(=O)OCCCC.[N-](S(=O)(=O)C(F)(F)F)S(=O)(=O)C(F)(F)F  | 2 <sup>63</sup>             |
| Phos_9_3                                         | [P+](C1CCCC1)(C1CCCC1)(C1CCCC1)CC(=O)OCCCCC.[N-](S(=O)(=O)C(F)(F)F)S(=O)(=O)C(F)(F)F | 3 <sup>63</sup>             |
| Phos_11_9                                        | [P+](C1CCCC1)(C1CCCC1)(C1CCCC1)CCCCOC(=O)C.[N-](S(=O)(=O)C(F)(F)F)S(=O)(=O)C(F)(F)F  | 9 <sup>63</sup>             |
| Phos_6_18                                        | [P+](C1CCCC1)(C1CCCC1)(C1CCCC1)CC(=O)OCCC.[O-]S(=O)(=O)OCCCCCCC                      | 18 <sup>63</sup>            |
| Phos_8_22                                        | [P+](C1CCCC1)(C1CCCC1)(C1CCCC1)CC(=O)OCCCC.[O-]S(=O)(=O)OCCCCCCC                     | 22 <sup>63</sup>            |
| Phos_10_21                                       | [P+](C1CCCC1)(C1CCCC1)(C1CCCC1)CC(=O)OCCCCC.[O-]S(=O)(=O)OCCCCCCC                    | 21 <sup>63</sup>            |
| Phos_12_22                                       | [P+](C1CCCC1)(C1CCCC1)(C1CCCC1)CCCCOC(=O)C.[O-]S(=O)(=O)OCCCCCCC                     | 22 <sup>63</sup>            |
| Phos_21_15                                       | [P+](CCCCC)(CCCCC)(CCCCC)CC(=O)OCCC.[O-]S(=O)(=O)OCCCCCCC                            | 15 <sup>63</sup>            |
| Phos_23_20                                       | [P+](CCCCC)(CCCCC)(CCCCC)CC(=O)OCCCC.[O-]S(=O)(=O)OCCCCCCC                           | 20 <sup>63</sup>            |
| Phos_25_30                                       | [P+](CCCCC)(CCCCC)(CCCCC)CC(=O)OCCCCC.[O-]S(=O)(=O)OCCCCCCC                          | 30 <sup>63</sup>            |
| Phos_27_5                                        | [P+](CCCCC)(CCCCC)(CCCCC)CCCCOC(=O)C.[O-]S(=O)(=O)OCCCCCCC                           | 5 <sup>63</sup>             |
| Phos_29_18                                       | [P+](CCCCC)(CCCCC)(CCCCC)CC=C.[O-]S(=O)(=O)OCCCCCCC                                  | 18 <sup>63</sup>            |
| Phos_31_11                                       | [P+](CCCCC)(CCCCC)(CCCCC)COC.[O-]S(=O)(=O)OCCCCCCC                                   | 11 <sup>63</sup>            |
| Phos_33_9                                        | [P+](CCCCC)(CCCCC)(CCCCC)CCO.[O-]S(=O)(=O)OCCCCCCC                                   | 9 <sup>63</sup>             |
| Phos_36_50                                       | CCCC[P+](C)(CCCC)CCCC.COS(=O)(=O)[O-]                                                | 50 <sup>35</sup>            |
| Phos_1_4                                         | [P+](C1CCCC1)(C1CCCC1)(C1CCCC1)CC(=O)OCCC.[Br-]                                      | 4 <sup>63</sup>             |
| Phos_2_3                                         | [P+](C1CCCC1)(C1CCCC1)(C1CCCC1)CC(=O)OCCCC.[Br-]                                     | 3 <sup>63</sup>             |

|            |                                                   |                  |
|------------|---------------------------------------------------|------------------|
| Phos_3_2   | [P+](C1CCCC1)(C1CCCC1)(C1CCCC1)CC(=O)OCCCCC.[Br-] | 2 <sup>63</sup>  |
| Phos_4_9   | [P+](C1CCCC1)(C1CCCC1)(C1CCCC1)CCCCOC(=O)C.[I-]   | 9 <sup>63</sup>  |
| Phos_13_12 | [P+](CCCCC)(CCCCC)(CCCCC)CC(=O)OCCC.[Br-]         | 12 <sup>63</sup> |
| Phos_14_4  | [P+](CCCCC)(CCCCC)(CCCCC)CC(=O)OCCCC.[Br-]        | 4 <sup>63</sup>  |
| Phos_15_10 | [P+](CCCCC)(CCCCC)(CCCCC)CC(=O)OCCCCC.[Br-]       | 10 <sup>63</sup> |
| Phos_16_0  | [P+](CCCCC)(CCCCC)(CCCCC)CCCCOC(=O)C.[I-]         | 0 <sup>63</sup>  |
| Phos_34_9  | [P+](CC)(CCCC)(CCCC)CCCC.[O-]P(=O)(OCC)OCC        | 9 <sup>13</sup>  |
| Phos_18_2  | [P+](CCCCC)(CCCCC)(CCCCC)COC.[Cl-]                | 2 <sup>63</sup>  |
| Phos_19_0  | [P+](CCCCC)(CCCCC)(CCCCC)CCO.[Br-]                | 0 <sup>63</sup>  |
| Phos_17_8  | [P+](CCCCC)(CCCCC)(CCCCC)CC=C.[Br-]               | 8 <sup>63</sup>  |
| Phos_38_11 | CCCCCCCCCCCC[P+](CCCCC)(CCCCC)CCCCC.C(=[N-])=NC#N | 11 <sup>11</sup> |

#### Data for pyrrolidinium ILs

Table S6: Biodegradability data for pyrrolidinium ILs.

| IL<br>(cation_number_<br>biodegradation<br>rate) | SMILES                                                                                           | biodegradation rate in<br>% |
|--------------------------------------------------|--------------------------------------------------------------------------------------------------|-----------------------------|
| Pyrr_21_14                                       | [O-]S(C)(=O)=O.[O-]<br>]S(C)(=O)=O.C[N+](CCCC1)Cc1cn(nn1)CCOCCOCCOCCOCCOCCn1cc(nn1)C[N+](C)CCCC1 | 14 <sup>16</sup>            |
| Pyrr_16_4                                        | CCCC[N+](C)CCCC1.[O-]S(=O)(=O)OC                                                                 | 4 <sup>46</sup>             |
| Pyrr_8_7                                         | CCCC[N+](CCCC1)C.[N-](S(=O)(=O)F)S(=O)(=O)F                                                      | 7 <sup>64</sup>             |
| Pyrr_7_0                                         | CCC[N+](CCCC1)C.C(F)(F)(F)S(=O)(=O)[N-]S(=O)(=O)C(F)(F)F                                         | 0 <sup>64</sup>             |
| Pyrr_9_40                                        | CCCC[N+](CCCC1)C.C(F)(F)(F)S(=O)(=O)[N-]S(=O)(=O)C(F)(F)F                                        | 40 <sup>65,66</sup>         |
| Pyrr_10_0                                        | CCCCC[N+](CCCC1)C.C(F)(F)(F)S(=O)(=O)[N-]S(=O)(=O)C(F)(F)F                                       | 0 <sup>64</sup>             |
| Pyrr_11_75                                       | FC(F)(F)S(=O)(=O)[N-]S(=O)(=O)C(F)(F)F.C[N+](CCCCC)CCCC1                                         | 75 <sup>64</sup>            |
| Pyrr_12_60                                       | FC(F)(F)S(=O)(=O)[N-]S(=O)(=O)C(F)(F)F.C[N+](CCCCCCC)CCCC1                                       | 60 <sup>64</sup>            |
| Pyrr_13_20                                       | FC(F)(F)S(=O)(=O)[N-]S(=O)(=O)C(F)(F)F.C[N+](CCCCCCCC)CCCC1                                      | 20 <sup>64</sup>            |
| Pyrr_14_78                                       | FC(F)(F)S(=O)(=O)[N-]S(=O)(=O)C(F)(F)F.C[N+](CCCCCCCC)CCCC1                                      | 78 <sup>64</sup>            |
| Pyrr_15_1                                        | C[N+](CCCC1)CCOC.C(F)(F)(F)S(=O)(=O)[N-]S(=O)(=O)C(F)(F)F                                        | 1 <sup>64,66</sup>          |
| Pyrr_18_0                                        | C[N+](COCCOC)CCCC1.FC(F)(F)S(=O)(=O)[N-]S(=O)(=O)C(F)(F)F                                        | 0 <sup>66</sup>             |
| Pyrr_1_69                                        | CCCCCCC[N+](CCCC1)C.[Cl-]                                                                        | 69 <sup>2</sup>             |
| Pyrr_3_2                                         | C[N+](CCCC1)CC#N.[Cl-]                                                                           | 2 <sup>2</sup>              |

|            |                                                              |                  |
|------------|--------------------------------------------------------------|------------------|
| Pyrr_4_14  | <chem>CCCC[N+](CCCC1)C.[Br-]</chem>                          | 14 <sup>2</sup>  |
| Pyrr_2_67  | <chem>C[N+](CCCC1)CCCO.[Cl-]</chem>                          | 67 <sup>2</sup>  |
| Pyrr_6_6   | <chem>C[N+](CCCC1)CCO.[I-]</chem>                            | 6 <sup>2</sup>   |
| Pyrr_19_0  | <chem>COCC[N+](C)CCCC1.F[B-](F)(F)F</chem>                   | 0 <sup>66</sup>  |
| Pyrr_5_34  | <chem>[Br-].O=C(OCC)C[N+](C)CCCC1</chem>                     | 34 <sup>2</sup>  |
| Pyrr_20_72 | <chem>CCCC[N+](C)CCCC1.CCCCCCCCCCCC(=O)N(C)CC([O-])=O</chem> | 72 <sup>32</sup> |
| Pyrr_17_37 | <chem>SCC(N)C([O-])=O.C[N+](CC)CCCC1</chem>                  | 37 <sup>21</sup> |

### Data for morpholinium ILS

Table S7: Biodegradability data for morpholinium ILS.

| IL<br>(cation_number_<br>biodegradation<br>rate) | SMILES                                                                                                                         | biodegradation rate in<br>% |
|--------------------------------------------------|--------------------------------------------------------------------------------------------------------------------------------|-----------------------------|
| Morph_1_12                                       | <chem>CCCC[N+](CCOCC1)C.[Br-]</chem>                                                                                           | 12 <sup>67</sup>            |
| Morph_5_0                                        | <chem>C[N+](CCOCC1)CCO.[I-]</chem>                                                                                             | 0 <sup>2</sup>              |
| Morph_6_31                                       | <chem>C[N+](CCOCC1)CCCO.[Cl-]</chem>                                                                                           | 31 <sup>2</sup>             |
| Morph_7_0                                        | <chem>C[N+](CCOCC1)CC#N.[Cl-]</chem>                                                                                           | 0 <sup>2</sup>              |
| Morph_8_0                                        | <chem>[Cl-].C[N+](Cc2ccccc2)CCOCC1</chem>                                                                                      | 0 <sup>68</sup>             |
| Morph_9_30                                       | <chem>CC[N+](CCOCC1)C.[Br-]</chem>                                                                                             | 30 <sup>67</sup>            |
| Morph_10_3                                       | <chem>CCCCC[N+](CCOCC1)C.[Br-]</chem>                                                                                          | 3 <sup>67</sup>             |
| Morph_11_4                                       | <chem>[Br-].C[N+](CCCCCCC)CCOCC1</chem>                                                                                        | 4 <sup>67</sup>             |
| Morph_12_5                                       | <chem>CCCCCCCCC[N+](CCOCC1)C.[Br-]</chem>                                                                                      | 5 <sup>67</sup>             |
| Morph_13_0                                       | <chem>C[N+](CCCC)CCOCC1.FC(F)(F)C(C(F)(F)F)O[Al-]<br/>](OC(C(F)(F)F)C(F)(F)F)(OC(C(F)(F)F)C(F)(F)F)OC(C(F)(F)F)C(F)(F)F</chem> | 0 <sup>30</sup>             |
| Morph_14_17                                      | <chem>C[N+](CC(N[C@@H](CC2=CC=CC=C2)C(OCC)=O)=O)CCOCC1.[Br-]</chem>                                                            | 17 <sup>22</sup>            |
| Morph_15_100                                     | <chem>O=C([O-])CN(C)C(=O)CCCCCCCCC.C1C[NH2+]CCO1</chem>                                                                        | 100 <sup>32</sup>           |

## Data for DABCO ILs

Table S8: Biodegradability data for DABCO ILs.

| IL<br>(cation_number_<br>biodegradation<br>rate) | SMILES                                                                      | biodegradation rate in<br>% |
|--------------------------------------------------|-----------------------------------------------------------------------------|-----------------------------|
| DABCO_1_0                                        | <chem>FC(F)(F)S(=O)(=O)[N-]S(=O)(=O)C(F)(F)F.CCCCCC[N+]12CCN(CC1)CC2</chem> | 0 <sup>45</sup>             |
| DABCO_2_0                                        | <chem>FC(F)(F)S(=O)(=O)[N-]S(=O)(=O)C(F)(F)F.CCCCCC[N+]12CCN(CC1)CC2</chem> | 0 <sup>45</sup>             |
| DABCO_3_0                                        | <chem>N#C[N-]C#N.OCC[N+]12CCN(CC1)CC2</chem>                                | 0 <sup>45</sup>             |
| DABCO_4_40                                       | <chem>CC[N+]12CCN(CC1)CC2.[Br-]</chem>                                      | 40 <sup>67</sup>            |
| DABCO_5_37                                       | <chem>CCCC[N+]12CCN(CC1)CC2.[Br-]</chem>                                    | 37 <sup>67</sup>            |
| DABCO_6_22                                       | <chem>[Br-].CCCCC[N+]12CCN(CC1)CC2</chem>                                   | 22 <sup>67</sup>            |
| DABCO_7_35                                       | <chem>CCCCCCCC[N+]12CCN(CC1)CC2.[Br-]</chem>                                | 35 <sup>67</sup>            |
| DABCO_8_35                                       | <chem>[Br-].CCCCCCCCC[N+]12CCN(CC1)CC2</chem>                               | 35 <sup>67</sup>            |

## Data for piperidinium ILs

Table S9: Biodegradability data for piperidinium ILs.

| IL<br>(cation_number_<br>biodegradation<br>rate) | SMILES                                                                  | biodegradation rate in<br>% |
|--------------------------------------------------|-------------------------------------------------------------------------|-----------------------------|
| Piperi_1_0                                       | <chem>CCCC[N+]1(CCCCC1)C.[Br-]</chem>                                   | 0 <sup>2</sup>              |
| Piperi_2_3                                       | <chem>CCC[N+]1(CCCCC1)C.C(F)(F)(F)S(=O)(=O)[N-]S(=O)(=O)C(F)(F)F</chem> | 3 <sup>2</sup>              |
| Piperi_3_79                                      | <chem>C[N+]1(CCCCC1)CCCO.[Cl-]</chem>                                   | 79 <sup>2</sup>             |
| Piperi_4_29                                      | <chem>C[N+]1(CCCCC1)CCO.[Cl-]</chem>                                    | 29 <sup>2</sup>             |
| Piperi_5_5                                       | <chem>C[N+]1(CCCCC1)CC#N.[Cl-]</chem>                                   | 5 <sup>2</sup>              |
| Piperi_8_28                                      | <chem>C[N+]1(CC)CCCCC1.[O-]C(=O)C(N)CS</chem>                           | 28 <sup>21</sup>            |
| Piperi_9_100                                     | <chem>O=C([O-])CN(C)C(=O)CCCCCCCCC.[NH2+]1CCCCC1</chem>                 | 100 <sup>32</sup>           |

## Data for piperazinium ILS

Table S10: Biodegradability data for piperazinium ILS.

| IL<br>(cation_number_<br>biodegradation<br>rate) | SMILES                                                                      | biodegradation rate in<br>% |
|--------------------------------------------------|-----------------------------------------------------------------------------|-----------------------------|
| Pipera_1_1                                       | <chem>C[N+](CCCCC)CCN(C)CC1.FC(F)(F)S(=O)(=O)[N-]S(=O)(=O)C(F)(F)F</chem>   | 1 <sup>45</sup>             |
| Pipera_2_1                                       | <chem>C[N+](CCCCCCC)CCN(C)CC1.FC(F)(F)S(=O)(=O)[N-]S(=O)(=O)C(F)(F)F</chem> | 1 <sup>45</sup>             |

## Data for prolinium ILS

Table S11: Biodegradability data for prolinium ILS.

| IL<br>(cation_number_<br>biodegradation<br>rate) | SMILES                                                                               | biodegradation rate in<br>% |
|--------------------------------------------------|--------------------------------------------------------------------------------------|-----------------------------|
| Pro1_1_23                                        | <chem>O=C(C[N@+](C)CCC[C@@]1([H])C(OCC)=O)N[C@@H](CC2=CC=CC=C2)C(OCC)=O.[Br-]</chem> | 23 <sup>22,26</sup>         |
| Pro1_2_19                                        | <chem>OC([C@]1([H])[N+](CC(N[C@@H](CC2=CC=CC=C2)C(OCC)=O)=O)(C)CCC1)=O.[Br-]</chem>  | 19 <sup>26</sup>            |
| Pro1_3_15                                        | <chem>CCOC([C@]1([H])[N+](CC(N[C@@H](CC2=CC=CC=C2)C(O)=O)=O)(C)CCC1)=O.[Br-]</chem>  | 15 <sup>26</sup>            |

## Data for thiazolium ILS

Table S12: Biodegradability data for thiazolium ILS.

| IL<br>(cation_number_<br>biodegradation<br>rate) | SMILES                                                               | biodegradation rate in<br>% |
|--------------------------------------------------|----------------------------------------------------------------------|-----------------------------|
| Thia_1_3                                         | <chem>CC[n+](csc1.C(F)(F)(F)S(=O)(=O)[N-]S(=O)(=O)C(F)(F)F</chem>    | 3 <sup>44</sup>             |
| Thia_2_7                                         | <chem>c1csc[n+](1CCO.C(F)(F)(F)S(=O)(=O)[N-]S(=O)(=O)C(F)(F)F</chem> | 7 <sup>44</sup>             |

## Clustering of ILs per cation core structure: Structural features of ILs

### Structural features of imidazolium ILs for every cluster

The imidazolium ILs were divided into 27 clusters thereby indicating a structurally diverse set of compounds. For every cluster a cluster centroid was generated, which represents the structural features of the ILs (Table S13). However, not every cluster centroid incorporates all structural features of the ILs within a cluster. Both ILs in cluster 1 contain at least one phenyl group, which is in one IL fully fluorinated. In cluster 2 all ILs incorporate a halogenide anion (bromide or chloride). The cation is twofold substituted with methyl and either cyano, benzyl, ethyl or ethenyl. This indicates variations in the cation. However, there was no distinct shared structural feature. The same applies for the cluster 11 and 15. The anions as well as the cations show no distinct shared structural feature. In cluster 11 the anions are tetrafluoroborate or hexafluorophosphate or tetrahexafluoroisopropoxyaluminate or dibutylphosphate. The cations contain alkyl chains and/or ester groups or ethenyl. Three out of six ILs have the tetrahexafluoroisopropoxyaluminate anion in common, two of six the fluorinated inorganic anion and a cation with ester groups. In cluster 15 the anions are dicyanamide or lauroyl sarcosinate or trifluoroacetate, while the cations incorporate only alkyl chains or cyano and ether or ester and an n-alkyl chain as functional groups. Three of five ILs have a cyano in common either in the cation or in the anion, while two ILs share the lauroyl sarcosinate anion. The cations in cluster 3 and 4 have n-alkyl side chains in common. In contrast to cluster 4, the cations in cluster 3 are fourfold or fivefold substituted by n-alkyl chains shorter than propyl. In cluster 4 the alkyl chains are longer than butyl. While in cluster 3 all anions are iodide, in cluster 4 the anions are bromide, chloride, iodide or dicyanamide. In cluster 4 some ILs are also dicationic only substituted with n-alkyl chains. This is a difference to the dicationic ILs in cluster 13, which contain ester groups in side chains. The ILs in cluster 6 are characterized by amino acid anions and n-alkyl side chains attached to the cation. In cluster 7 the cation possesses amino acids in side chains and the anion is bromide. Both ILs in cluster 8 have a bromide anion and the same side chains of the cation (pyrrolidine amide, ethylacetate, benzyl side chains). The difference between them is that one IL contains two pyrrolidine amide side chains. Cluster 9 shows the amide group as structural feature of all ILs and the anions are either bromide or tetrafluoroborate. The pyrrolidine amide, as in cluster 8, is also present in most of the ILs, but in contrast to cluster 8 the ethylacetate side chain is absent. Both ILs in cluster 5 contain also the amide group in the cation, but in contrast to cluster 8 and 9, the nitrogen atom is linked only twice to carbon and additionally once to hydrogen. The ILs in cluster 10 are characterized by a fluorinated inorganic anion (tetrafluoroborate or hexafluorophosphate) and a cation substituted with two n-alkyl chains. This makes the difference to cluster 12, where the anion is also tetrafluoroborate. Cluster 12, 14 and 18 have in common a cation containing one or more ester groups. Some cations are the same in cluster 12 and 18, but they differ in the anion. In cluster 12 all ILs incorporate a tetrafluoroborate anion, while in cluster 14 and 18 the bromide or iodide anion is prevalent. The structures in cluster 14 are different to cluster 12 and 18 as they incorporate longer n-alkyl side chains (< C3). Cluster 16 is characterized by cations with alkyl side chains, while all anions contain a carboxyl group. In cluster 17 the cation is for both ILs the same (1-(2-hydroxyethyl)-3-methylimidazolium), but the anion is either perfluoropentanoate or bromide. The ILs in cluster 16 and 17 with a perfluoropentanoate anion were not allocated to the same cluster because the cations are different (only alkyl chains or hydroxyethyl, respectively). Tris and tetrakis cations are allocated to cluster 19 and 20, which only differ in the imidazolium cation (cluster 19) and benzimidazolium cation (cluster 20). For both clusters the structural features are n-alkyl chains and ester groups in the cation as well as a chloride anion. Two ILs were excluded from the cluster analysis since their molecular size was too high. Due to their structure (tetrakis benzimidazolium cation with decyl or dodecyl alkyl chains) they would have been allocated to cluster 20. Furthermore, tris and tetrakis ILs are in cluster 21, which partially also have a benzimidazolium cation, but differ from the ILs in cluster 19 and 20 as the side chains end with a benzyl group and not with a n-alkyl chain. In cluster 22 and 23 the unique structural feature of the ILs are the anions, which only appear in these clusters. In cluster 22 it is the saccharinate anion and in cluster 23 the bis(trifluoromethylsulphonyl)amide anion. The cations are more diverse and contain n-alkyl chains or ester (cluster 22 and 23) or ether or cyano (cluster 23). The ILs in cluster 24 have a sulphonate group in the anion in common, while the cations contain either only n-alkyl chains or a hydroxyl group. In cluster 25, 26 and 27 all ILs contain an alkylsulphate anion. While for cluster 27 this is the octylsulphate anion, in cluster 25 and 26 the alkyl chain in the anion varies (hexyl, heptyl, octyl, nonyl, decyl or dodecyl) and in cluster 26 there is also one IL with a methanesulphonate anion. The cationic structure of these ILs explains the distribution in these clusters. In cluster 25 all cations have n-alkyl, benzyl or ethenyl side chains, whereas in cluster 26 an ester group is the prevailing structural feature in the side chains and in cluster 27 an amide group (Table S13).

Table S13: Cluster centroids for imidazolium ILs and structural features per cluster.

| No. | Structural features                                                                                                                                                                                                                                                                                                                                                                                                                                                                                                                                                                   | Number of ILs | Cluster centroid                                                                     |
|-----|---------------------------------------------------------------------------------------------------------------------------------------------------------------------------------------------------------------------------------------------------------------------------------------------------------------------------------------------------------------------------------------------------------------------------------------------------------------------------------------------------------------------------------------------------------------------------------------|---------------|--------------------------------------------------------------------------------------|
| 1   | Twofold substituted cation, substituents of the first IL: fluorinated phenyl and methyl, second IL: benzyl, bromide anion                                                                                                                                                                                                                                                                                                                                                                                                                                                             | 2             | 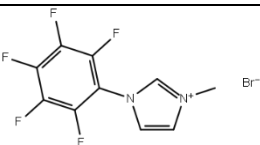   |
| 2   | Twofold substituted cation, first side chain is methyl and second side chain is benzyl or cyano or allyl or ethyl, bromide or chloride anion                                                                                                                                                                                                                                                                                                                                                                                                                                          | 4             |    |
| 3   | Four- or fivefold substituted cation, substituents: ethyl or methyl or isopropyl, iodide anion                                                                                                                                                                                                                                                                                                                                                                                                                                                                                        | 3             |    |
| 4   | Twofold and fourfold substituted cation or dicationic cations; dicationic ILs: cations connected via alkyl chains (ethyl, butyl, hexyl), alkyl chain as second substituent at each cation (methyl, hexyl, dodecyl, tetradecyl, hexadecyl), bromide anion; twofold substituted cation: first side chain is methyl or ethenyl or phenyl, second side chain is butyl or hexyl or octyl or decyl or dodecyl or hexadecyl, halogenide anion (bromide, chloride, iodide), dicyanamide anion; fourfold substituted cation: first side chain is hexyl, three methyl side chains, iodide anion | 19            |    |
| 5   | Twofold substituted cation, first side chain is methyl, second side chain contains butylcarbamoylmethyl, one IL contains an additional benzyl rest at the methyl of the butylcarbamoylmethyl group, bromide anion                                                                                                                                                                                                                                                                                                                                                                     | 2             |  |
| 6   | Twofold substituted cation, first side chain is methyl, ethyl or butyl or hexyl as second side chain, L-prolinate anion or L-valinate anion or L-cysteinate or L-histidinate or L-phenylalaninate or L-aspartate or glycinate anion                                                                                                                                                                                                                                                                                                                                                   | 9             |  |
| 7   | Twofold substituted cation, one cation with two phenylalanine side chains, for the others first side chain is methyl, second side chain is phenylalanine group with attached alkyl chains (C2, C4, C6, C8, C10, C12) or tyrosine group with attached ethyl chain or a dipeptidyl phenylalanine-leucine chain, bromide anion                                                                                                                                                                                                                                                           | 9             |  |
| 8   | Threefold and fourfold substituted cation; threefold substituted cation: pyrrolidine amide and ethylethanoate and benzyl side chains; fourfold substituted cation: two pyrrolidine amide side chains and ethylethanoate and benzyl side chains, bromide anion                                                                                                                                                                                                                                                                                                                         | 2             |  |
| 9   | Twofold and threefold substituted cation; twofold substituted cation: methyl or benzyl as first side chain, pyrrolidine amide or n-butyl-N-methylcarbamoylmethyl or N,N-diethylcarbamoylmethyl as second side chain; threefold substituted cation: methyl as first                                                                                                                                                                                                                                                                                                                    | 7             |  |

|    |                                                                                                                                                                                                                                                                                                                                                                                                                                                                               |    |                                                                                      |
|----|-------------------------------------------------------------------------------------------------------------------------------------------------------------------------------------------------------------------------------------------------------------------------------------------------------------------------------------------------------------------------------------------------------------------------------------------------------------------------------|----|--------------------------------------------------------------------------------------|
|    | side chain, pyrrolidine amide side chain as second side chain, methyl or amide as third side, bromide anion or tetrafluoroborate anion                                                                                                                                                                                                                                                                                                                                        |    |                                                                                      |
| 10 | Twofold substituted cation, first side chain is methyl, second side chain is propyl or butyl or decyl, tetrafluoroborate anion or hexafluorophosphate anion                                                                                                                                                                                                                                                                                                                   | 4  | 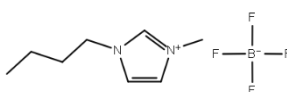   |
| 11 | Twofold and threefold substituted cation; twofold substituted cation: methyl and propylethanoate or butyl or hexyl or propenyl; threefold substituted cation: two methyl side chains and butyl as third side chain, tetrahexafluoroisopropoxyaluminumate or tetrafluoroborate anion, hexfluorophosphate anion or dibutylphosphate                                                                                                                                             | 6  |    |
| 12 | Twofold, threefold and fourfold substituted cation; twofold substituted cation: methyl and methylethanoate side chains; threefold substituted cation: methyl and ethylethanoate and ethylmethanoate or two methyl side chains and 2-methylpropylmethanoate; fourfold substituted cation: two methyl side chains and two methylmethanoate or methyl and two methylmethanoate and ethylethanoate or benzyl and two methylmethanoate and ethylethanoate, tetrafluoroborate anion | 6  |    |
| 13 | Dicationic, ester group in side chain, bromide anion or chloride anion                                                                                                                                                                                                                                                                                                                                                                                                        | 6  |  |
| 14 | Twofold and threefold substituted cation; twofold substituted cation: methyl or butyl or hexyl as first side chain, propylethanoate or butylethanoate or pentylethanoate or hexylethanoate or octylethanoate or ethylbenzoate or ester of mandelic acid (C4) as second side chain; threefold substituted cation: two methyl side chains and propylethanoate or pentylethanoate, bromide anion or iodide anion                                                                 | 11 |  |
| 15 | Twofold substituted cation: methyl or acetocyano as first side chain, ethyl or butyl or propylethanoate or ethoxyethane as second side chain, dicyanamide anion or lauroyl sarcosinate or trifluoroacetate                                                                                                                                                                                                                                                                    | 5  |  |
| 16 | Twofold substituted cation: methyl as first side chain, ethyl or butyl as second side chain, lactate anion or levulinatate (oxopentanoate) or acetate anion or perfluoropentanoate anion                                                                                                                                                                                                                                                                                      | 4  |  |



|    |                                                                                                                                                                                                                                                                                                                                                                                                                                                                                                                                                                             |    |                                                                                      |
|----|-----------------------------------------------------------------------------------------------------------------------------------------------------------------------------------------------------------------------------------------------------------------------------------------------------------------------------------------------------------------------------------------------------------------------------------------------------------------------------------------------------------------------------------------------------------------------------|----|--------------------------------------------------------------------------------------|
| 17 | Twofold substituted cation: methyl as first side chain, hydroxyethyl as second side chain, perfluoropentanoate anion or bromide anion                                                                                                                                                                                                                                                                                                                                                                                                                                       | 2  | 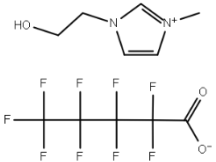   |
| 18 | Twofold, threefold and fourfold substituted cation; twofold substituted cation: methyl as first side chain and ester of mandelic acid (C1, C2) or acetic acid or methylethanoate or ethylethanoate as second side chain; threefold substituted cation: methyl and ethylethanoate and ethylmethanoate side chains or two methyl side chains and 2-methylpropylmethanoate or methyl and amide and methylethanoate; fourfold substituted cation: two methyl side chains and two methylmethanoate or two methylethanoate and benzyl and ethylethanoate, bromide or iodide anion | 10 |    |
| 19 | Tris- and tetrakis side chains: (N-butyl-imidazoliumyl-acetayloxy)methyl or (N-hexyl-imidazoliumyl-acetayloxy)methyl or (N-octyl-imidazoliumyl-acetayloxy)methyl or (N-decyl-imidazoliumyl-acetayloxy)methyl or (N-dodecyl-imidazoliumyl-acetayloxy)methyl, chloride anion                                                                                                                                                                                                                                                                                                  | 10 |   |
| 20 | Benzimidazolium cation, tris- and tetrakis side chains: (N-butyl-benzimidazoliumyl-acetayloxy)methyl or (N-hexyl-benzimidazoliumyl-acetayloxy)methyl or (N-octyl-benzimidazoliumyl-acetayloxy)methyl or (N-decyl-benzimidazoliumyl-acetayloxy)methyl or (N-dodecyl-benzimidazoliumyl-acetayloxy)methyl, chloride anion                                                                                                                                                                                                                                                      | 8  |  |
| 21 | Tris- and tetrakis side chains: (N-benzyl-benzimidazoliumyl-acetayloxy)methyl or (N-benzyl-imidazoliumyl-acetayloxy)methyl, chloride anion                                                                                                                                                                                                                                                                                                                                                                                                                                  | 4  |  |

|    |                                                                                                                                                                                                                                                                                                                                                                               |    |                                                                                      |
|----|-------------------------------------------------------------------------------------------------------------------------------------------------------------------------------------------------------------------------------------------------------------------------------------------------------------------------------------------------------------------------------|----|--------------------------------------------------------------------------------------|
| 22 | Twofold substituted cation: methyl as first side chain, butyl or pentylethanoate as second side chain, saccharinate anion                                                                                                                                                                                                                                                     | 2  | 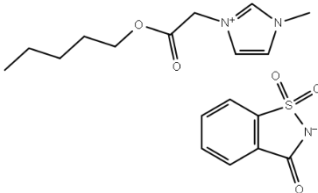   |
| 23 | Twofold substituted cation: methyl or acetocyano as first side chain, butyl or ester or ether as second side chain, bis(trifluoromethylsulphonyl)amide anion                                                                                                                                                                                                                  | 5  |    |
| 24 | Twofold substituted cation: methyl as first side chain, ethyl or butyl or hydroxyethyl as second side chain, methanesulphonate anion or perfluorobutanesulphonate                                                                                                                                                                                                             | 3  |    |
| 25 | Twofold substituted cation: methyl or ethenyl as first side chain, benzyl or propenyl or butyl or hexyl as second side chain, hexylsulphate anion or heptylsulfate anion or octylsulphate anion or nonylsulphate anion or decylsulfate anion or dodecylsulphate anion                                                                                                         | 15 |    |
| 26 | Twofold and threefold substituted cation; twofold substituted cation: methyl as first side chain, second chain contains ester or a combinations of ester and ethers; threefold substituted cation: two methyl side chains, third side chain incorporates ester or a combinations of ester and ethers, octylsulphate anion or dodecylsulphate anion or methanesulphonate anion | 18 |   |
| 27 | Twofold and threefold substituted cation; twofold substituted cation: methyl and acetyl pyrrolidine or N,N-bis(2-methoxyethyl)acetamide; threefold substituted cation: two methyl chains and acetyl pyrrolidine, octylsulphate anion                                                                                                                                          | 3  |  |

## Structural features of pyridinium ILs for every cluster

12 clusters were generated for 96 pyridinium ILs and the cluster centroids show the representative structural features of each cluster (Table S14). The ILs in cluster 1 have a bromide anion in common and an ester or carboxyl group in side chains of the cation. These could be incorporated in a phenylalanine or tyrosine moiety. Further substituents could be a methoxy group or a dimethylamino group. For the ILs in cluster 2 the structural feature of the cation is a phenylalanine moiety with different n-alkyl chains attached and a bromide anion. In cluster 3 all cations contain an amide group in the substituents, which are either acetamide, n-butyl-2-phenylacetamide or n-acetyl-L-alanine amide or 2-acetamido-3-phenylpropanamide. A further substituent could be hydroxyimino methyl in m- and p- and o-position. All anions are bromide. The ILs in cluster 4 have in common that all cations incorporate either different n-alkyl chains or benzyl or cyanomethyl, while the anions encompass bromide, chloride, hexafluorophosphate and dicyanamide. The ILs in cluster 5 possess different structural features, which cannot be combined under a general category. All have in common an ester in the cation or a carboxyl group in the anion. The ILs with an ester in the cation incorporate inorganic anions, like bromide, iodide and hexafluorophosphate. The cations contain either ethyl methanoate or ethyl ethanoate or butyl methanoate or ester derived from mandelic acid. Further substituents could be benzyl, alkyl chains, methoxy. The IL without an ester in the cation shows a carboxyl group in the perfluoropentanoate anion, while the cation is substituted by n-alkyl chains. In cluster 6 all ILs contain a lauroyl sarcosinate anion and the cations are substituted with n-alkyl chains. Cluster 7, 10 and 11 have the cations in common, but vary in the anion. While in cluster 7 pyridinium cations incorporate a hydroxyl group in m-position and ether groups in different alkyl chains as well as a chloride anion, in cluster 10 and 11 the cations have the same structural features and the anions are acesulfamate and saccharinate, respectively. Cluster 8 encompasses single cationic and dicationic ILs incorporating an inorganic anion, like chloride, iodide, hexafluorophosphate. The single cationic ILs contain a hydroxyethyl group, while in the dicationic ILs both cations are connected via ether bonds. All pyridinium ILs with an octylsulphate anion or bis(trifluoromethylsulfonyl)amide anion are allocated to cluster 9 and 12, respectively. The cations in cluster 9 are substituted by different n-alkyl chains or ester or ether or butylcarbamoyl. The cations in cluster 12 encompass a dicationic IL with ether bonds connecting both cations and for single cationic ILs substituents are acetic acid, allyl, benzyl, carbamate, ether, ester, hydroxyethyl and tertiary amine (Table S14).

Table S14: Cluster centroids for pyridinium ILs and structural features per cluster.

| No. | Structural features                                                                                                                                                                                                                                                                                                                                                    | Number of ILs | Cluster centroid |
|-----|------------------------------------------------------------------------------------------------------------------------------------------------------------------------------------------------------------------------------------------------------------------------------------------------------------------------------------------------------------------------|---------------|------------------|
| 1   | Single or twofold substituted cation, substituents at N: acetic acid or phenylalanine group with or without attached ethyl chain or tyrosine group with attached ethyl chain, substituents in m- and p-position to substituents at N: methoxy group or dimethylamino group or acetic acid or ethyl methanoate, bromide anion                                           | 12            |                  |
| 2   | Single substituted cation at N: acetic acid or phenylalanine group with attached alkyl chains via ester bonds (C4, C6, C8, C10, C12), bromide anion                                                                                                                                                                                                                    | 5             |                  |
| 3   | Single and twofold substituted cations, single substituted cation: substituents at N: n-butyl-2-phenylacetamide, twofold substituted: substituents at N: octyl chain connected to cation via acetamide or n-acetyl-L-alanine amide or 2-acetamido-3-phenylpropanamide substituents in m- and p- and o-position to substituents at N: hydroxyimino methyl bromide anion | 6             |                  |
| 4   | Single substituted cation: substituents at N: alkyl chain (C3, C4, C10, C16), benzyl, cyanomethyl, twofold substituted cation: substituents at N: alkyl chain (C4, C6, C8), substituents in m- and p-position to substituents at N: methyl, inorganic anions (bromide, chloride, hexafluorophosphate), one organic anion (dicyanamide)                                 | 13            |                  |

|    |                                                                                                                                                                                                                                                                                                                                                                                                                                                                                                                                                                |    |  |
|----|----------------------------------------------------------------------------------------------------------------------------------------------------------------------------------------------------------------------------------------------------------------------------------------------------------------------------------------------------------------------------------------------------------------------------------------------------------------------------------------------------------------------------------------------------------------|----|--|
| 5  | Single substituted cation: substituents at N: esters of mandelic acid (C1, C2, C4) or ethyl ethanoate, twofold substituted cation: substituents at N: ethyl or methyl or benzyl or esters of mandelic acid (C2, C4) or ethyl methanoate, substituents in m-position to substituents at N: methyl or methoxy or ethylmethanoate or butyl methanoate or inorganic anion (bromide, iodide, hexafluorophosphate) and one organic anion perfluoropentanoate                                                                                                         | 11 |  |
| 6  | Single and threefold substituted cations, single substituted cation: n-butyl or n-hexyl at N, threefold substituted cation: substituents at N: n-octyl, methyl group in m- and p-position to substituents at N, lauroyl sarcosinate anion                                                                                                                                                                                                                                                                                                                      | 3  |  |
| 7  | twofold substituted cation, substituents at N: ether bonds in alkyl chains (propoxymethyl, heptyloxymethyl, undecyloxymethyl, octadecyloxymethyl) substituents in m-position to substituents at N: hydroxyl group, chloride anion                                                                                                                                                                                                                                                                                                                              | 4  |  |
| 8  | Single and dicationic, single substituted cation at N: hydroxyethyl group (single cationic) or cations connected via ether bonds, (dicationic), inorganic anions (chloride, iodide, hexafluorophosphate)                                                                                                                                                                                                                                                                                                                                                       | 4  |  |
| 9  | Single and twofold substituted cations, single substituted at N: butyl or ethyl ethanoate, twofold substituted: substituents at N: methyl or butyl or octyl or ethyl ethanoate or pentyl ethanoate, substituents in m-position to substituents at N: butyl methanoate or methyl or methoxymethyl or ethoxymethyl, butylcarbamoyl, octylsulphate anion                                                                                                                                                                                                          | 11 |  |
| 10 | Twofold substituted cation, substituents at N: ether bonds in alkyl chains (propoxymethyl, butoxymethyl, hexyloxymethyl, heptyloxymethyl, undecyloxymethyl, octadecyloxymethyl) substituents in m-position to substituents at N: hydroxyl group, acesulfamate anion                                                                                                                                                                                                                                                                                            | 6  |  |
| 11 | Twofold substituted cation, substituents at N: ether bonds in alkyl chains (propoxymethyl, butoxymethyl, hexyloxymethyl, heptyloxymethyl, undecyloxymethyl, octadecyloxymethyl) substituents in m-position to substituents at N: hydroxyl group, saccharinate anion                                                                                                                                                                                                                                                                                            | 6  |  |
| 12 | Single and dicationic, single and twofold substituted, dicationic: single substituted cations connected via ether bonds, single cationic and single substituted at N: hydroxyethyl or carbamate or butyl or ethyl ethanoate or allyl or benzyl or tertiary amine single cationic and twofold substituted: substituents at N: hydroxyethyl or ethoxymethyl or methyl or butyl, substituents in m-position to substituents at N: butyl methanoate or butyl or methoxymethyl or tertiary amine or methyl or acetic acid, bis(trifluoromethylsulphonyl)amide anion | 15 |  |

## Structural features of QACs for every cluster

The 60 QACs are divided in 10 cluster (Table S15). Cluster 1 differ to the other cluster as the ILs have all a cation with a phenylalanine moiety bonded to different n-alkyl chains via an ester. The anion is chloride. Cluster 2, 5, 7 and 8 contain all ILs with anions based on carboxylic acids. In contrast to cluster 5, 7 and 8, in cluster 2, except one IL, the cations contain at least one hydroxyethyl group. In cluster 5 the ILs also incorporate acetate as anion as in cluster 2, whereas the cation is twofold or threefold substituted with linear ethyl chains. The main difference between cluster 5, 7 and 8 is that in cluster 5 the cations are twofold and threefold substituted with alkyl chains, whereas in cluster 7 and 8 the cations incorporate four alkyl side chains of different n-alkyl length. All QACs with a bis(trifluoromethylsulphonyl)amide anion are allocated to cluster 3 and all with a methylsulphonate or methylsulphate anion to cluster 4. The cations in both clusters are characterized by linear alkyl chains, while in cluster 3 some cations also contain hydroxyethyl groups or a N-(2-(dimethylamino)ethyl) group. The anions in cluster 6 are all based on amino acids, while the cation is substituted by only ethyl or butyl chains. In cluster 9 the ILs contain an inorganic anion (halogenide or hydroxyl or nitrite anion), while the cation is substituted by mainly n-alkyl chains of different length. One cation also contains a benzyl group. The IL in cluster 10 also contains a halogenide anion compared to cluster 9, but only methyl chains in the cation.

Table S15: Cluster centroids for QACs and structural features per cluster.

| No. | Structural features                                                                                                                                                                                                                                                                                                                                                                              | Number of ILs | Cluster centroid                                                                     |
|-----|--------------------------------------------------------------------------------------------------------------------------------------------------------------------------------------------------------------------------------------------------------------------------------------------------------------------------------------------------------------------------------------------------|---------------|--------------------------------------------------------------------------------------|
| 1   | Phenylalanine cation bonded to alkyl chains (C2, C4, C6, C8, C10, C12, C14, C16) via an ester, chloride anion                                                                                                                                                                                                                                                                                    | 8             | 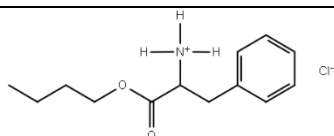   |
| 2   | Nitrogen in cation substituted with one or two or three hydroxyethyl chains or with one dodecyl chain, formate or acetate or propionate or butanoate or isobutanoate or pentanoate or 2,5,8,11-tetraoxatridecan-13-oate                                                                                                                                                                          | 11            |    |
| 3   | Threefold substituted cation by octyl chains and one methyl chain or twofold substituted by methyl chains and one hexyl chain and one N-(2-(dimethylamino)ethyl) chain or twofold substituted by ethyl chains and one hexyl chain and one hydroxyethyl chains or twofold substituted by hydroxyl ethyl chains and one butyl chain and one pentyl chain, bis(trifluoromethylsulphonyl)amide anion | 4             |  |
| 4   | Threefold substituted cation by methyl chains and one butyl chain or threefold substituted cation by ethyl chains and one methyl chain or threefold substituted cation by butyl chains and one methyl chain, methylsulphonate or methylsulphate                                                                                                                                                  | 3             |  |
| 5   | Twofold and threefold substituted cation by ethyl side chains, acetate anion                                                                                                                                                                                                                                                                                                                     | 2             |  |
| 6   | Fourfold substituted cation by ethyl chains or butyl chains, L-cysteinate anion or prolinat or 4-hydroxyprolinat anion                                                                                                                                                                                                                                                                           | 4             |  |
| 7   | Fourfold substituted cation by two methyl and two butyl chains or four butyl chains, L-tartrate or L-lactate or L-malate or citrate or glucuronate or succinate or malonate or pyruvate or pelargonate anion                                                                                                                                                                                     | 10            |  |

|    |                                                                                                                                                                                                                                                                                                                   |    |                                                                                     |
|----|-------------------------------------------------------------------------------------------------------------------------------------------------------------------------------------------------------------------------------------------------------------------------------------------------------------------|----|-------------------------------------------------------------------------------------|
| 8  | Fourfold substituted cation by two methyl chains and two decyl chains or three methyl chains and one hexadecyl chain or two methyl chains and two ethenyl groups or two methyl chains and two butyl chains, acetate or sorbate or succinate or levulinate or itaconate or pelargonate or stearate or oleate anion | 11 | 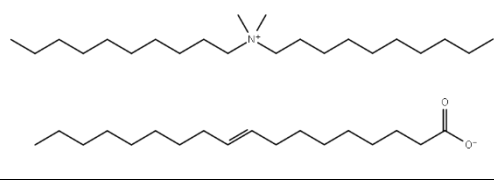  |
| 9  | Fourfold substituted cation by ethyl chains or butyl chains or twofold substituted cation by methyl chains and two butyl chains or two decyl chains or tetradecyl chain and benzyl, bromide anion or chloride anion, hydroxyl anion or nitrite anion                                                              | 6  |   |
| 10 | Fourfold substituted cation by methyl side chains, bromide anion                                                                                                                                                                                                                                                  | 1  |  |

### Structural features of cholinium ILs for every cluster

For analysing the biodegradation of cholinium ILs 80 compounds were grouped in 13 clusters (Table S16). The characterization of each cluster is summarized with regard to structural features of the ILs, the number of ILs per cluster and the cluster centroid (Table S16). Cluster 1 is characterized by a sulphonate anion, which is either perfluorobutanesulphonate or methylsulphonate, while the cation is cholinium. One of the three ILs contains a choline methyl ether cation and a methylsulphonate anion. The ILs in cluster 2 contain a cholinium derivative as cation. Instead of the hydroxyethyl side chain, they incorporate diethyl ether or ethylethanoate or ethylprop-2-enoate or ethyl-2-methylprop-2-enoate. The anions are either 4-oxopentanoate or chloride. The ILs in cluster 3 contain the cholinium cation, except for one IL it is the dodecylbetainium cation. The anions are either lauroyl sarcosinate or nonanoate or dodecanoate or tetradecanoate or hexadecanoate or octadecanoate anion showing all a carboxyl group and alkyl chains equal or longer than nonyl. The ILs in cluster 4 contain all the cholinium cation. The anions are all based on amino acids. Like in cluster 4, the ILs in cluster 5 contain all the cholinium cation, but vary in the anion. All anions incorporate a carboxyl group and are based on amino acids or aromatics or cycloalkyl compounds or linear alkyl carboxylic acids or keto acids. The reason why the two ILs with an amino acid anion in cluster 5 were not assigned to cluster 4 could be that the phenylalanine anion is based on an aromatic amino acid and therefore is structurally more related to the other aromatic anions in cluster 5. The glycinate anion in cluster 5 was not assigned to cluster 4 possibly because it is based on the simplest amino acid and more structurally related to the acetate anion due to the number of carbon atoms. In cluster 6 all cations incorporate a phenylalanine or a structurally related tyrosine moiety, which are bonded via an ester to an alkyl chain of varying length. The anion is bromide. The unique structural feature in cluster 7 is the indole-3-butyrate anion, while the cation is characterized by an elongated linear alkyl side chain (C2-C12), which replaces one methyl chain in the cholinium cation. In cluster 9 there is also one IL with an indole-3-butyrate anion, but the cation is the pure cholinium cation, why this IL has more structural features with the ILs in cluster 9 in common. These ILs have all the cholinium cation, while the anion is based on an amino acid. Especially the tryptophanate anion is structurally related to the indole-3-butyrate anion. The amino acid anions in cluster 9 differentiate from the ones in cluster 4 and 5 as the histidinate, prolinatate and tryptophanate anion contain all a ring of five atoms, of which one is at least nitrogen, and the arginate anion is structurally not well related to the ones in cluster 4 due to its guanidine moiety. In cluster 8 the structural features of both ILs are a cholinium cation and either a desoxycholate or lithocholate anion differentiating them from all other cholinium ILs. Cluster 10 contains cholinium derivatives. The cation is characterized by a D-glucose moiety in a side chain and a second side chain of different linear alkyl chains. The anion is bromide. The cluster 11, 12 and 13 have in common that the anions are based on herbicides. The cations differ as in cluster 11 the prevalent cation is dodecylbetainium, in cluster 12 the cation is an ester derivative of cholinium and in cluster 13 the cations are either betaine or carnitine (Table S16).

Table S16: Cluster centroids for cholinium ILs and structural features per cluster.

| No. | Structural features                                                                                                                                                                      | Number of ILs | Cluster centroid                                                                     |
|-----|------------------------------------------------------------------------------------------------------------------------------------------------------------------------------------------|---------------|--------------------------------------------------------------------------------------|
| 1   | Cholinium cation or choline methyl ether, perfluorobutanesulphonate anion or methylsulphonate anion                                                                                      | 3             | 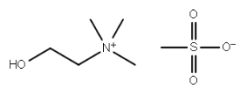 |
| 2   | Cholinium derivatives: instead of hydroxyethyl side chain: diethyl ether or ethylethanoate or ethylprop-2-enoate or ethyl-2-methylprop-2-enoate, 4-oxopentanoate anion or chloride anion | 4             |  |

|    |                                                                                                                                                                                                                                                                                                                                                                              |    |                                                                                      |
|----|------------------------------------------------------------------------------------------------------------------------------------------------------------------------------------------------------------------------------------------------------------------------------------------------------------------------------------------------------------------------------|----|--------------------------------------------------------------------------------------|
| 3  | Cholinium cation or dodecylbetainium, lauroyl sarcosinate or nonanoate or dodecanoate or tetradecanoate or hexadecanoate or octadecanoate anion                                                                                                                                                                                                                              | 6  | 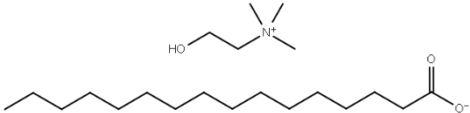   |
| 4  | Cholinium cation, L-alaninate or L-valinate or L-leucinate or L-isoleucinate or L-serinate or L-threoninate or L-methioniate or L-aspartate or L-glutamate or L-asparaginate or L-glutamininate or L-lysinate or L-cysteinate anion                                                                                                                                          | 13 |    |
| 5  | Cholinium cation, acetate or glycinate or phenylalaninate or 4-oxopentanoate or perfluoropentanoate or cycloalkyl anions with carboxylate group (cyclopentane carboxylate or cyclopentane acetate or cyclohexane carboxylate or cyclohexane propionate) or aromatic anions with carboxylate group (benzoate or salicylate or 2-naphthoxyacetate or anthracene-9-carboxylate) | 13 |    |
| 6  | Cholinium derivatives: instead of one methyl side chain: phenylalanine group with attached alkyl chains via ester bonds (C4, C6, C8, C10, C12) or tyrosine group with attached alkyl chains via ester bonds (C2), bromide anion                                                                                                                                              | 8  |    |
| 7  | Cholinium derivatives: one methyl chain is changed to: ethyl or butyl or hexyl or octyl or decyl or dodecyl side chain, indole-3-butyrate anion                                                                                                                                                                                                                              | 6  |   |
| 8  | Cholinium cation, salts of bile acids as anion (desoxycholate or lithocholate)                                                                                                                                                                                                                                                                                               | 2  |  |
| 9  | Cholinium cation, L-histidinate or L-argininate or L-prolinate or L-tryptophanate or indole-3-butyrate anion                                                                                                                                                                                                                                                                 | 5  |  |
| 10 | Cholinium derivatives: methyl or dodecyl or hexadecyl chain at positively charged N, N-[2-(2,3,4,6-tetra-O-acetyl-β-D-glucopyranosyloxy)-ethyl]-moiety, bromide anion                                                                                                                                                                                                        | 3  |  |
| 11 | Cholinium derivatives: dodecylbetainium cation, (2,4-dichlorophenoxy)acetate or (4-chloro-2-methylphenoxy)acetate or 3,6-dichloro-2-methoxybenzoate anion or 2-(4-chloro-2-methylphenoxy)propionate                                                                                                                                                                          | 4  |  |
| 12 | Cholinium derivatives: acetylcholine or instead of hydroxyethyl side chain: ethylprop-2-enoate or ethyl-2-methylprop-2-enoate, (2,4-dichlorophenoxy)acetate or (4-chloro-2-methylphenoxy)acetate or 3,6-dichloro-2-methoxybenzoate                                                                                                                                           | 5  |  |

|    |                                                                                                                                                                                            |   |                                                                                    |
|----|--------------------------------------------------------------------------------------------------------------------------------------------------------------------------------------------|---|------------------------------------------------------------------------------------|
| 13 | Cholinium derivatives: betaine or carnitine, (2,4-dichlorophenoxy)acetate or (4-chloro-2-methylphenoxy)acetate or 3,6-dichloro-2-methoxybenzoate or 2-(4-chloro-2-methylphenoxy)propionate | 8 | 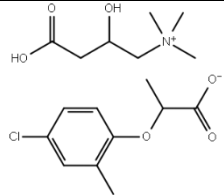 |
|----|--------------------------------------------------------------------------------------------------------------------------------------------------------------------------------------------|---|------------------------------------------------------------------------------------|

### Structural features of phosphonium ILs for every cluster

The 36 phosphonium ILs have been divided into 12 clusters (Table S17). The ILs in cluster 2, 5 and 8 consist of a tri-n-hexylphosphonium cation incorporating an ester group in the fourth side chain, which underlies variations in chain length, while the anion varies too per cluster. The anions per cluster are bis(trifluoromethylsulphonyl)amide, octylsulphate and halogenide, respectively. The same applies for cluster 3, 4 and 7. In cluster 3, 4 and 7 the cation is a tri-cyclohexylphosphonium with an ester group in the fourth side chain varying in chain length, while the anions are bis(trifluoromethylsulphonyl)amide, octylsulphate and bromide or iodide, respectively. Cluster 1 and 6 have both the tri-n-hexylphosphonium cation with variations in functional groups in the fourth side chain (allyl or hydroxyl or ether) in common, but differentiate in the anion as in cluster 1 the ILs contain a bis(trifluoromethylsulphonyl)amide anion and in cluster 6 octylsulphate. In addition, the fourth IL in cluster 6 incorporates a tri-n-hexylphosphonium cation as well and a methyl group as fourth side chain. The anion is methylsulphate, which is structurally related to the octylsulphate anion of the three other ILs. The IL in cluster 9 incorporates a diethylphosphate anion and an ethyltributylphosphonium cation. The cations in cluster 10, 11 and 12 are similar to the ones in cluster 1 and 6, but the anion is a halogenide. The ILs in cluster 10, 11 and 12 are not together in one cluster because of the manual adjustments in dividing the sILs into more cluster and automatically generated cluster 10, 11 and 12, which was necessary to generate cluster 2 and 3 and to differentiate between these ILs. Cluster 13 contains the only IL with a dicyanamide anion (Table S17).

Table S17: Cluster centroids for phosphonium ILs and structural features per cluster.

| No. | Structural features                                                                                                                                           | Number of ILs | Cluster centroid                                                                     |
|-----|---------------------------------------------------------------------------------------------------------------------------------------------------------------|---------------|--------------------------------------------------------------------------------------|
| 1   | Tri-n-hexyl, fourth chain consists of either allyl or hydroxyethyl or methoxymethyl groups, bis(trifluoromethylsulphonyl)amide anion                          | 3             | 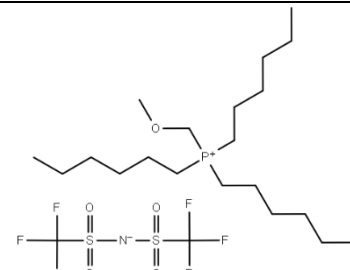 |
| 2   | Tri-n-hexyl, ester group in fourth chain (propylethanoate or pentylethanoate or heptylethanoate or acetoxybutyl), bis(trifluoromethylsulphonyl)amide anion    | 4             |  |
| 3   | Tri-cyclohexyl, ester group in fourth chain (propylethanoate or pentylethanoate or acetoxybutyl or heptylethanoate), bis(trifluoromethylsulphonyl)amide anion | 4             |  |



|    |                                                                                                                                                                                         |   |                                                                                      |
|----|-----------------------------------------------------------------------------------------------------------------------------------------------------------------------------------------|---|--------------------------------------------------------------------------------------|
| 4  | Tri cyclohexyl, ester group in fourth chain (propylethanoate or pentylethanoate or heptylethanoate or acetoxybutyl), octylsulphate anion                                                | 4 | 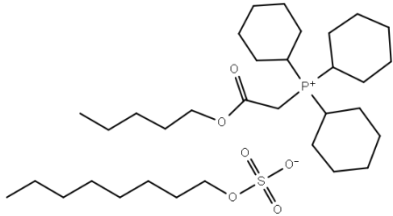   |
| 5  | Tri-n-hexyl, ester group in fourth chain (propylethanoate or pentylethanoate or heptylethanoate or acetoxybutyl), octylsulphate anion                                                   | 4 |    |
| 6  | Three ILs: tri-n-hexyl, fourth chain consists of either allyl or methoxymethyl or hydroxyethyl, octylsulphate anion, fourth IL: tri-butyl, fourth chain is methyl, methylsulphate anion | 4 |    |
| 7  | Tri-cyclohexyl, ester group in fourth chain (propylethanoate or pentylethanoate or heptylethanoate or acetoxybutyl)), halogenide anion                                                  | 4 |   |
| 8  | Tri-n-hexyl, ester group in fourth chain (propylethanoate or pentylethanoate or heptylethanoate or acetoxybutyl), halogenide anion                                                      | 4 |  |
| 9  | Tri-n-butyl and ethyl chains, diethylphosphate anion                                                                                                                                    | 1 |  |
| 10 | Tri-n-hexyl, methoxymethyl, chloride anion                                                                                                                                              | 1 |  |

|    |                                            |   |                                                                                    |
|----|--------------------------------------------|---|------------------------------------------------------------------------------------|
| 11 | Tri-n-hexyl, hydroxyethyl, bromide anion   | 1 | 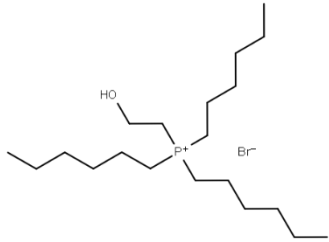 |
| 12 | Tri-n-hexyl, allyl group, bromide anion    | 1 |  |
| 13 | Tri-n-hexyl, tetradecyl, dicyanamide anion | 1 |  |

#### Structural features of pyrrolidinium ILs for every cluster

21 pyrrolidinium ILs have been divided in 11 cluster according to their similarity and are structurally characterized by a cluster centroid (Table S18). The number of clusters was adjusted manually in order to differentiate between the ILs into more detail. Cluster 1 contains the only dicationic pyrrolidinium IL. In cluster 2, 3 and 11 the cations incorporate alkyl chains, while the anions are methylsulphate, bis(fluorosulphonyl)amide and cysteinate, respectively. Cluster 4 is characterized by cations incorporating different alkyl side chains and a bis(trifluoromethylsulphonyl)amide anion. In cluster 5 and 9 ether groups are attached to the cations, while the anions are bis(trifluoromethylsulphonyl)amide and tetrafluoroborate, respectively. Cluster 6 consists of three ILs, of which two incorporate a pyrrolidinium cation with different alkyl side chains and the third IL contains an additional cyano group in the side chain, which do not show similarity at first sight. However, it was not possible to divide cluster 6 without splitting the other cluster into more cluster, which would result in a loss of generalization. Both ILs in cluster 7 and 8 contain a cation with a hydroxyl group, but differentiate in the halogenide anion. In cluster 10 both ILs are characterized by the structural feature NCCOO(H or R) either in the cation as ester or in the lauroyl sarcosinate anion as carboxyl group (Table S18).

Table S18: Cluster centroids for pyrrolidinium ILs and structural features per cluster.

| No. | Structural features                                                                                                                                      | Number of ILs | Cluster centroid                                                                     |
|-----|----------------------------------------------------------------------------------------------------------------------------------------------------------|---------------|--------------------------------------------------------------------------------------|
| 1   | Dicationic, connected via triazole and ether bonds, methanesulphonate anion                                                                              | 1             | 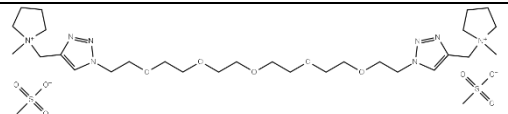   |
| 2   | Butyl and methyl side chains of the cation, methylsulphate anion                                                                                         | 1             |    |
| 3   | Butyl and methyl side chains of the cation, bis(fluorosulphonyl)amide anion                                                                              | 1             |    |
| 4   | Different alkyl side chains of the cation (C3, C4, C6, C7, C8, C9, C10), bis(trifluoromethylsulphonyl)amide anion                                        | 7             |    |
| 5   | Ether bonds in propyl, butyl side chains of the cation, bis(trifluoromethylsulphonyl)amide anion                                                         | 2             |    |
| 6   | Different side chains of the cation (C4, C8), one IL with ethyl side chain and an additional cyano group, halogenide anion                               | 3             |    |
| 7   | Propyl side chain with a hydroxyl group, chloride anion                                                                                                  | 1             |   |
| 8   | Ethyl side chain with a hydroxyl group, iodide anion                                                                                                     | 1             |  |
| 9   | Ether bond in propyl side chain of the cation, tetrafluoroborate anion                                                                                   | 1             |  |
| 10  | First IL: ester bond in side chain of the cation, bromide anion; second IL: butyl, methyl side chains, carboxyl group in the anion (lauroyl sarcosinate) | 2             |  |
| 11  | Ethyl and methyl side chains of the cation, cysteinate anion                                                                                             | 1             |  |

## References

- 1 H. B. T. Thu, M. Markiewicz, J. Thöming, R. M. Reich, V. Korinth, M. Cokoja, F. E. Kühn and S. Stolte, *New J. Chem.*, 2015, **39**, 5431–5436.
- 2 J. Neumann, S. Steudte, C.-W. Cho, J. Thöming and S. Stolte, *Green Chem.*, 2014, **16**, 2174–2184.
- 3 J. R. Harjani, J. Farrell, M. T. Garcia, R. D. Singer and P. J. Scammells, *Green Chem.*, 2009, **11**, 821–829.
- 4 E. Liwarska-Bizukojc and D. Gendaszewska, *J. Biosci. Bioeng.*, 2013, **115**, 71–75.
- 5 E. Liwarska-Bizukojc, C. Maton, C. V. Stevens and D. Gendaszewska, *J. Chem. Technol. Biotechnol.*, 2014, **89**, 763–768.
- 6 M. T. Garcia, N. Gathergood and P. J. Scammells, *Green Chem.*, 2005, **7**, 9–14.
- 7 N. Gathergood, M. T. Garcia and P. J. Scammells, *Green Chem.*, 2004, **6**, 166–175.
- 8 N. Gathergood, P. J. Scammells and M. T. Garcia, *Green Chem.*, 2006, **8**, 156–160.
- 9 K. M. Docherty, J. K. Dixon and C. F. Kulpa, *Biodegradation*, 2007, **18**, 481–493.
- 10 K. M. Docherty, S. W. Aiello, B. K. Buehler, S. E. Jones, B. R. Szymczyna and K. A. Walker, *Chemosphere*, 2015, **136**, 160–166.
- 11 V. R. Thamke, A. U. Chaudhari, S. R. Tapase, D. Paul and K. M. Kodam, *Environ. Pollut.*, 2019, **250**, 567–577.
- 12 B. Peric, J. Sierra, E. Martí, R. Cruañas, M. A. Garau, J. Arning, U. Bottin-Weber and S. Stolte, *J. Hazard. Mater.*, 2013, **261**, 99–105.
- 13 A. S. Wells and V. T. Coombe, *Org. Process Res. Dev.*, 2006, **10**, 794–798.
- 14 M. Markiewicz, C. Jungnickel, C.-W. Cho and S. Stolte, *Environ. Sci.: Process. Impacts*, 2015, **17**, 1462–1469.
- 15 M. Markiewicz, J. Henke, A. Brillowska-Dąbrowska, S. Stolte, J. Łuczak and C. Jungnickel, *Int. J. Environ. Sci. Technol.*, 2014, **11**, 1919–1926.
- 16 S. Steudte, S. Bemowsky, M. Mahrova, U. Bottin-Weber, E. Tojo-Suarez, P. Stepnowski and S. Stolte, *RSC Adv.*, 2014, **4**, 5198–5205.
- 17 S. Stolte, T. Schulz, C.-W. Cho, J. Arning and T. Strassner, *ACS Sustain. Chem. Eng.*, 2013, **1**, 410–418.
- 18 E. Müller, L. Zahnweh, B. Estrine, O. Zech, C. Allolio, J. Heilmann and W. Kunz, *J. Mol. Liq.*, 2018, **251**, 61–69.
- 19 G. Wang, X. Xu, Y. Sun, L. Zhuang and C. Yao, *J. Mol. Liq.*, 2019, **278**, 145–155.
- 20 H. Prydderch, A. Haiß, M. Spulak, B. Quilty, K. Kümmerer, A. Heise and N. Gathergood, *RSC Adv.*, 2017, **7**, 2115–2126.
- 21 S. Wu, F. Li, L. Zeng, C. Wang, Y. Yang and Z. Tan, *RSC Adv.*, 2019, **9**, 10100–10108.
- 22 A. Jordan, A. Haiß, M. Spulak, Y. Karpichev, K. Kümmerer and N. Gathergood, *Green Chem.*, 2016, **18**, 4374–4392.
- 23 M. Suk, A. Haiß, J. Westphal, A. Jordan, A. Kellett, I. V. Kapitanov, Y. Karpichev, N. Gathergood and K. Kümmerer, *Green Chem.*, 2020, **22**, 4498–4508.
- 24 D. Coleman, M. Špulák, M. T. Garcia and N. Gathergood, *Green Chem.*, 2012, **14**, 1350–1356.
- 25 I. V. Kapitanov, A. Jordan, Y. Karpichev, M. Spulak, L. Perez, A. Kellett, K. Kümmerer and N. Gathergood, *Green Chem.*, 2019, **21**, 1777–1794.
- 26 A. Haiß, A. Jordan, J. Westphal, E. Logunova, N. Gathergood and K. Kümmerer, *Green Chem.*, 2016, **18**, 4361–4373.
- 27 R. G. Gore, L. Myles, M. Spulak, I. Beadham, T. M. Garcia, S. J. Connon and N. Gathergood, *Green Chem.*, 2013, **15**, 2747–2760.
- 28 Y. Yu, X. Lu, Q. Zhou, K. Dong, H. Yao and S. Zhang, *Chem. Eur. J.*, 2008, **14**, 11174–11182.
- 29 A. Zgajnar Gotvajn, E. Tratar-Pirc, P. Bukovec and P. Znidaršič Plazl, *Water Sci. Technol.*, 2014, **70**, 698–704.
- 30 S. Bulut, P. Klose, M.-M. Huang, H. Weingärtner, P. J. Dyson, G. Laurenczy, C. Friedrich, J. Menz, K. Kümmerer and I. Krossing, *Chem. Eur. J.*, 2010, **16**, 13139–13154.
- 31 J. J. Raj, S. Magaret, M. Pranesh, K. C. Lethesh, W. C. Devi and M. A. Mutalib, *J. Clean. Prod.*, 2019, **213**, 989–998.
- 32 N. A. Mustahil, S. H. Baharuddin, A. A. Abdullah, A. V. B. Reddy, M. I. Abdul Mutalib and M. Moniruzzaman, *Chemosphere*, 2019, 349–357.
- 33 M. Markiewicz, J. Maszkowska, V. Nardello-Rataj and S. Stolte, *RSC Adv.*, 2016, **6**, 87325–87331.
- 34 N. S. M. Vieira, S. Stolte, J. M. M. Araújo, L. P. N. Rebelo, A. B. Pereiro and M. Markiewicz, *ACS Sustain. Chem. Eng.*, 2019, **7**, 3733–3741.
- 35 M. Lotfi, M. Moniruzzaman, M. Sivapragasam, S. Kandasamy, M. I. Abdul Mutalib, N. B. Alitheen and M. Goto, *J. Mol. Liq.*, 2017, **243**, 124–131.
- 36 N. N. Al-Mohammed, R. S. Duali Hussen, T. H. Ali, Y. Alias and Z. Abdullah, *RSC Adv.*, 2015, **5**, 21865–21876.
- 37 N. N. Al-Mohammed, R. S. Duali Hussen, Y. Alias and Z. Abdullah, *RSC Adv.*, 2015, **5**, 2869–2881.
- 38 S. Morrissey, B. Pegot, D. Coleman, M. T. Garcia, D. Ferguson, B. Quilty and N. Gathergood, *Green Chem.*, 2009, **11**, 475–483.
- 39 S. J. Pandya, I. V. Kapitanov, Z. Usmani, R. Sahu, D. Sinha, N. Gathergood, K. K. Ghosh and Y. Karpichev, *J. Mol. Liq.*, 2020, **305**, 112857.
- 40 J. R. Harjani, R. D. Singer, M. T. Garcia and P. J. Scammells, *Green Chem.*, 2009, **11**, 83–90.
- 41 K. M. Docherty, M. V. Joyce, K. J. Kulacki and C. F. Kulpa, *Green Chem.*, 2010, **12**, 701–712.
- 42 J. R. Harjani, R. D. Singer, M. T. Garcia and P. J. Scammells, *Green Chem.*, 2008, **10**, 436–438.

- 43 M. Stasiewicz, E. Mulkiwicz, R. Tomczak-Wandzel, J. Kumirska, E. M. Siedlecka, M. Gołebowski, J. Gajdus, M. Czerwicka and P. Stepnowski, *Ecotoxicol. Environ. Saf.*, 2008, **71**, 157–165.
- 44 L. Ford, J. R. Harjani, F. Atefi, M. T. Garcia, R. D. Singer and P. J. Scammells, *Green Chem.*, 2010, **12**, 1783–1789.
- 45 L. Ford, K. E. O. Ylijoki, M. T. Garcia, R. D. Singer and P. J. Scammells, *Aust. J. Chem.*, 2015, **68**, 849–857.
- 46 S. Stolte, S. Steudte, O. Areitioaurtena, F. Pagano, J. Thöming, P. Stepnowski and A. Igartua, *Chemosphere*, 2012, **89**, 1135–1141.
- 47 L. Pisarova, S. Steudte, N. Dörr, E. Pittenauer, G. Allmaier, P. Stepnowski and S. Stolte, *Proc IMechE Part J: J Engineering Tribology*, 2012, **226**, 903–922.
- 48 N. Ferlin, M. Courty, A. N. van Nhien, S. Gatard, M. Pour, B. Quilty, M. Ghavre, A. Haiß, K. Kümmerer, N. Gathergood and S. Bouquillon, *RSC Adv.*, 2013, **3**, 26241–26251.
- 49 N. Ferlin, M. Courty, S. Gatard, M. Spulak, B. Quilty, I. Beadham, M. Ghavre, A. Haiß, K. Kümmerer, N. Gathergood and S. Bouquillon, *Tetrahedron*, 2013, **69**, 6150–6161.
- 50 J. Pernak, K. Czerniak, M. Niemczak, Ł. Ławniczak, D. K. Kaczmarek, A. Borkowski and T. Praczyk, *ACS Sustain. Chem. Eng.*, 2018, **6**, 2741–2750.
- 51 F. Boissou, A. Mühlbauer, K. de Oliveira Vigier, L. Leclercq, W. Kunz, S. Marinkovic, B. Estrine, V. Nardello-Rataj and F. Jérôme, *Green Chem.*, 2014, **16**, 2463–2471.
- 52 J. Pernak, B. Łęgosz, F. Walkiewicz, T. Klejdysz, A. Borkowski and Ł. Chrzanowski, *RSC Adv.*, 2015, **5**, 65471–65480.
- 53 J. Zabielska-Matejuk, A. Stangierska, E. Grabińska-Sota, K. Czaczyk and A. Drożdżyńska, *Drewno*, 2016, **59**.
- 54 J. Pernak, K. Czerniak, M. Niemczak, Ł. Chrzanowski, Ł. Ławniczak, P. Fochtman, K. Marcinkowska and T. Praczyk, *New J. Chem.*, 2015, **39**, 5715–5724.
- 55 R. Klein, E. Müller, B. Kraus, G. Brunner, B. Estrine, D. Touraud, J. Heilmann, M. Kellermeier and W. Kunz, *RSC Adv.*, 2013, **3**, 23347–23354.
- 56 X.-D. Hou, Q.-P. Liu, T. J. Smith, N. Li and M.-H. Zong, *PLoS one*, 2013, **8**, e59145.
- 57 A. Yazdani, M. Sivapragasam, J. M. Leveque and M. Moniruzzaman, *Microb. Biochem. Technol.*, 2016, **08**, 415–421.
- 58 D. K. Kaczmarek, T. Kleiber, L. Wenping, M. Niemczak, Ł. Chrzanowski and J. Pernak, *ACS Sustain. Chem. Eng.*, 2020, **8**, 1591–1598.
- 59 K. Erfurt, M. Markiewicz, A. Siewniak, D. Lisicki, M. Zalewski, S. Stolte and A. Chrobok, *ACS Sustain. Chem. Eng.*, 2020, **8**, 10911–10919.
- 60 M. Niemczak, Ł. Chrzanowski, T. Praczyk and J. Pernak, *New J. Chem.*, 2017, **41**, 8066–8077.
- 61 D. Czuryzkiewicz, A. Maćkowiak, K. Marcinkowska, A. Borkowski, Ł. Chrzanowski and J. Pernak, *ChemPlusChem*, 2019, **84**, 268–276.
- 62 J. Pernak, M. Niemczak, Ł. Chrzanowski, Ł. Ławniczak, P. Fochtman, K. Marcinkowska and T. Praczyk, *Chem. Eur. J.*, 2016, 12012–12021.
- 63 F. Atefi, M. T. Garcia, R. D. Singer and P. J. Scammells, *Green Chem.*, 2009, **11**, 1595–1604.
- 64 G. G. Eshetu, S. Jeong, P. Pandard, A. Lecocq, G. Marlair and S. Passerini, *ChemSusChem*, 2017, **10**, 3146–3159.
- 65 I. Juneidi, M. Hayyan and M. A. Hashim, *RSC Adv.*, 2015, **5**, 83636–83647.
- 66 C. Samorì, T. Campisi, M. Fagnoni, P. Galletti, A. Pasteris, L. Pezzolesi, S. Protti, D. Ravelli and E. Tagliavini, *ACS Sustain. Chem. Eng.*, 2015, **3**, 1860–1865.
- 67 C. Pretti, M. Renzi, S. E. Focardi, A. Giovani, G. Monni, B. Melai, S. Rajamani and C. Chiappe, *Ecotoxicol. Environ. Saf.*, 2011, **74**, 748–753.
- 68 J. Pernak, N. Borucka, F. Walkiewicz, B. Markiewicz, P. Fochtman, S. Stolte, S. Steudte and P. Stepnowski, *Green Chem.*, 2011, **13**, 2901–2910.
